# Supplementary material
Source: Royal Society of Chemistry journal article supplement (doi:10.1039/d6py00214e)
Supplement: d6py00214e1.pdf [file d6py00214e1.pdf]

# SUPPORTING INFORMATION

## **$\gamma$ -Functionalized Thioether, Sulfoxide, and Sulfone AB Monomers for Tunable Aliphatic Polyesters**

Hongqing Fu,<sup>a</sup> Emma Mongkhoun<sup>a</sup> and Nicolas Illy\*<sup>a</sup>

<sup>a</sup>Sorbonne Université, CNRS, Institut Parisien de Chimie Moléculaire, Equipe Chimie des Polymères, 4  
place Jussieu F-75005 Paris, France

### Content

|                                              |    |
|----------------------------------------------|----|
| 1. Synthesis of Poly(thioether-ester)s. .... | 2  |
| 2. Depolymerization of PTE. ....             | 3  |
| 3. AB monomer oxidation ....                 | 7  |
| 3.1. Before purification ....                | 7  |
| 3.2. After purification ....                 | 11 |
| 3.2.1. Sulfoxide ....                        | 11 |
| 3.2.2. Sulfone.....                          | 14 |
| 4. Polycondensation.....                     | 17 |
| 5. TGA and DSC.....                          | 24 |
| 6. Monomer and Polymer Solubility Table..... | 26 |
| 7. Individual HRMS results.....              | 27 |

# 1. Synthesis of Poly(thioether-*alt*-ester)s.

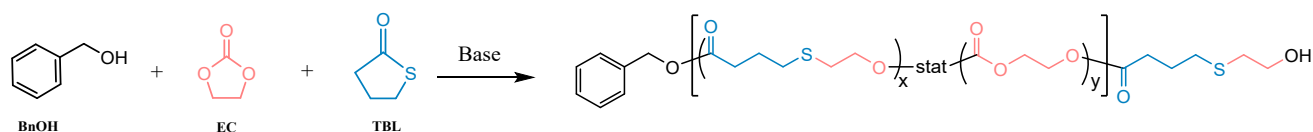

**Scheme S1.** Copolymerization of EC and TBL

**Table S1.** Experimental conditions and molecular characteristics of copolymerization

| Run | ROH: Base:<br>Epoxide: TBL | Base              | Time<br>(h) | Temp<br>(°C) | Cv <sup>a</sup> (%)<br>TBL | Cv <sup>b</sup> (%)<br>EC | $M_{n,th}^c$<br>(g mol <sup>-1</sup> ) | $M_{n,NMR}$<br>(g mol <sup>-1</sup> ) | $M_{n,SEC}^d$<br>(g mol <sup>-1</sup> ) | $\bar{D}$ | Cyclic<br>carbonate<br>units <sup>e</sup> (%) |
|-----|----------------------------|-------------------|-------------|--------------|----------------------------|---------------------------|----------------------------------------|---------------------------------------|-----------------------------------------|-----------|-----------------------------------------------|
| 1   | 1:1:50:50                  | DMAP              | 24          | 100          | 77                         | 99                        | 5729                                   | 3141                                  | 8200                                    | 1.92      | 8                                             |
| 2   | 1:1:50:50                  | BEMP              | 24          | 100          | 51                         | 75                        | 3836                                   | 3093                                  | 9600                                    | 1.83      | 12                                            |
| 3   | 1:1:50:50                  | tBuP <sub>4</sub> | 24          | 100          | 98                         | 95                        | 7052                                   | 11915                                 | 8500                                    | 3.90      | 5                                             |
| 4   | 1:1:50:50                  | DBU               | 24          | 100          | 100                        | 99                        | 5202                                   | 6765                                  | 9000                                    | 2.04      | 7                                             |
| 5   | 1:140:140                  | DBU               | 24          | 100          | 100                        | 100                       | 26737                                  | 15694                                 | 10000                                   | 2.24      | 6                                             |

<sup>a</sup> TBL conversion was determined by <sup>1</sup>H NMR in DMSO-d<sub>6</sub> of the reaction

<sup>b</sup> EC conversion was determined by <sup>1</sup>H NMR in DMSO-d<sub>6</sub> of the reaction

<sup>c</sup>  $M_{n,th}$  is calculated considering a perfectly alternating structure initiated by benzyl alcohol according to the following equation:

$$M_{n,theo} = M_{benzyl\ alcohol} + (M_{TBL} + M_{EO}) \times X_n^0 \text{ limiting monomer} \times p_{TBL}$$

<sup>d</sup> Determined by SEC (DMF, 45°C, poly(methyl methacrylate) standards).

<sup>e</sup>

$$Cv [Cyclic\ carbonate\ units\ (\%)] = \frac{X_{n,cy}}{X_{n,TL} + X_{n,EO}} = \frac{\frac{I(k+l)/4}{Ia/5}}{\frac{Ie/2}{Ia/IE} + \frac{Ih/2}{Ia/IE}}$$

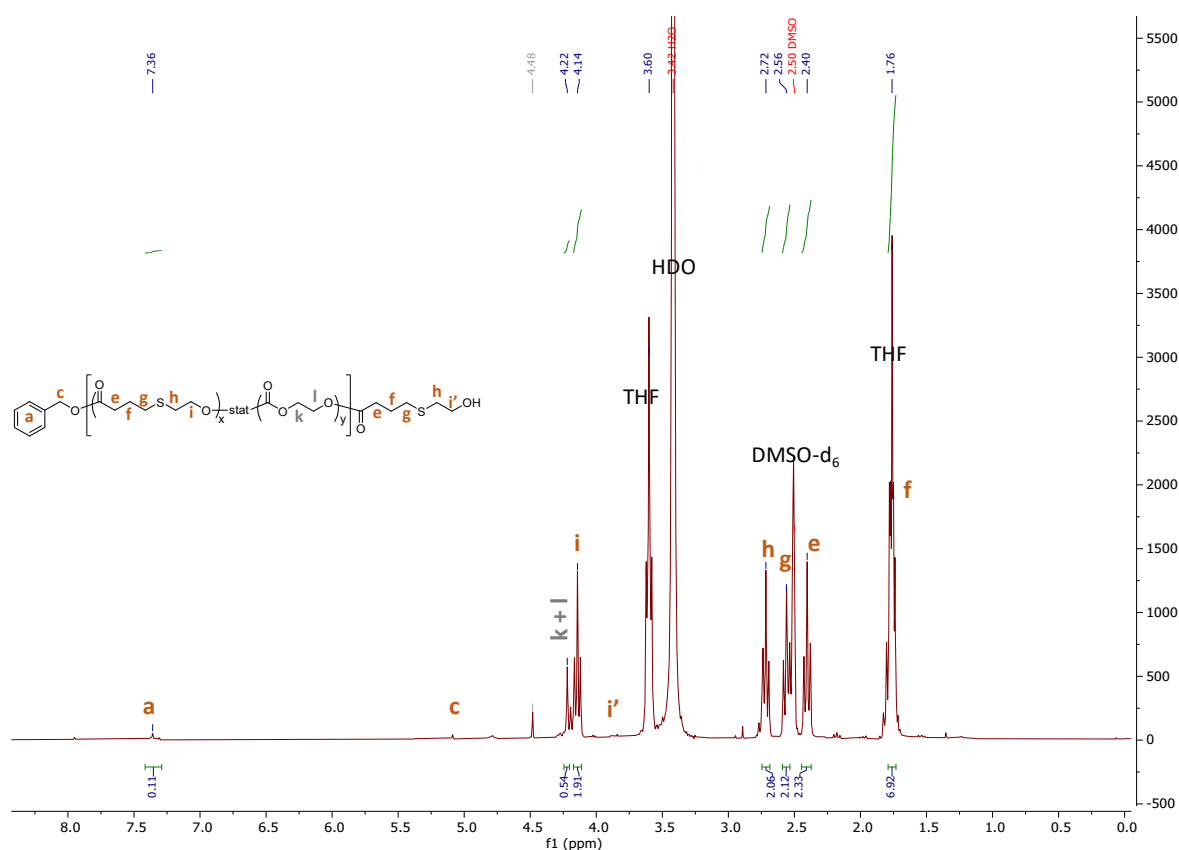

**Figure S1.**  $^1\text{H}$  NMR spectrum in DMSO- $d_6$  of PTE initiated by benzyl alcohol – DBU system in bulk at  $100^\circ\text{C}$ .

## 2. Depolymerization of PTE.

**Table S2.** Degradation experiment of PTE-EC in NaOH (0.1mol/L)

| Run | Time (h) | $M_{n, SEC}$ ( $\text{g mol}^{-1}$ ) | Degradation |
|-----|----------|--------------------------------------|-------------|
|     |          |                                      | 1 (%)       |
| 1   | 0        | 10000                                | 0           |
| 2   | 2        | 3500                                 | 50          |
| 3   | 4        | 3100                                 | 56          |
| 4   | 6        | 1000                                 | 62          |
| 5   | 8        | 500                                  | 68          |
| 6   | 16       | <50                                  | 93          |

<sup>1</sup> The percentage of degradation was calculated by  $^1\text{H}$  NMR according to the following equation

$$\% \text{deg} = \left( 1 - \frac{I_i}{I_{c+e}} \right) \times 100$$

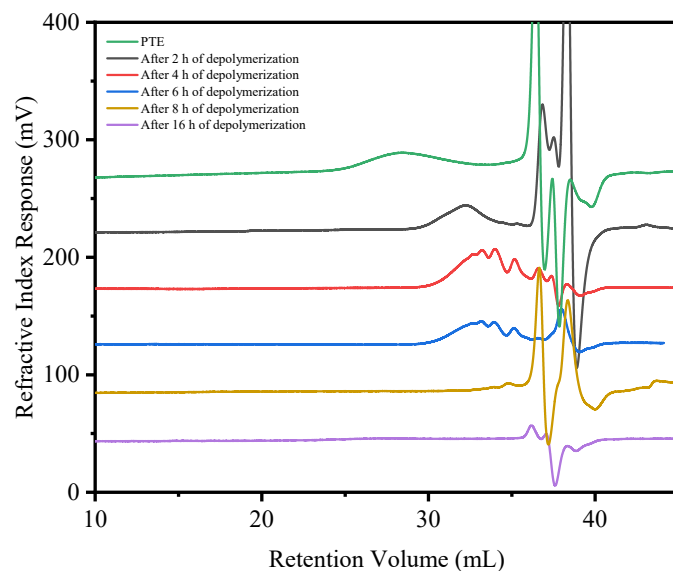

**Figure S2.** SEC chromatogram monitoring of PTE depolymerization by a  $1 \text{ mol}\cdot\text{L}^{-1}$  NaOH solution in a THF/MeOH mixture (1:1, v/v).

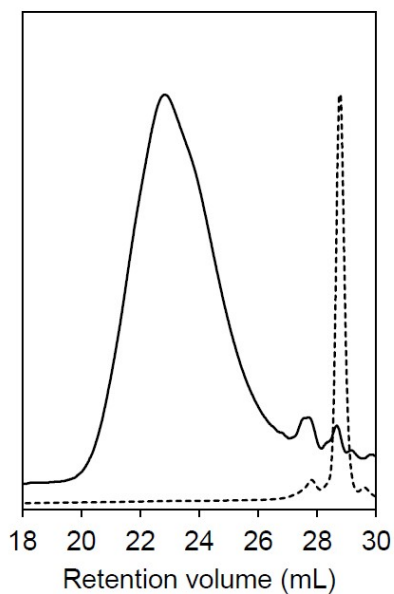

**Figure S3.** SEC chromatograms in THF at  $40^\circ\text{C}$  of PTE (solid line) and its degradation product (dotted line)

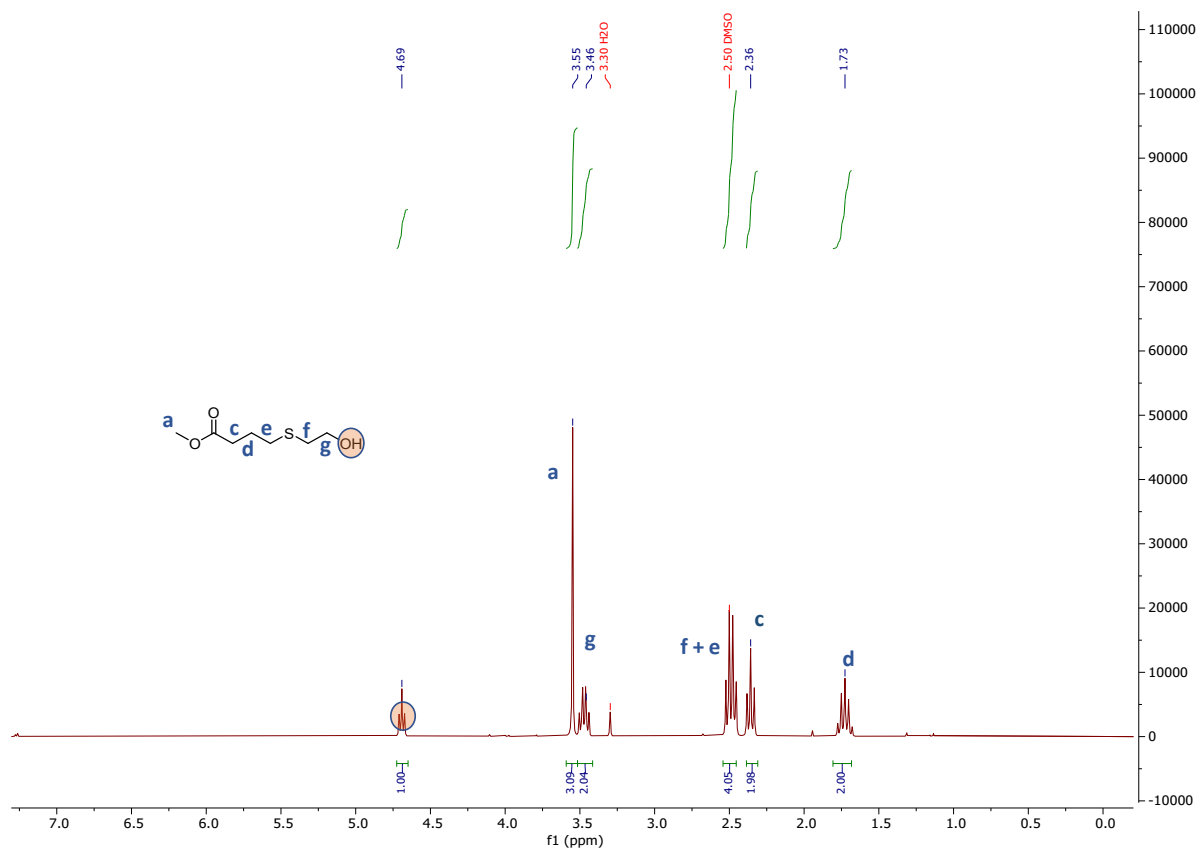

Figure S4. <sup>1</sup>H NMR spectrum of MTB after purification in DMSO-d<sub>6</sub>

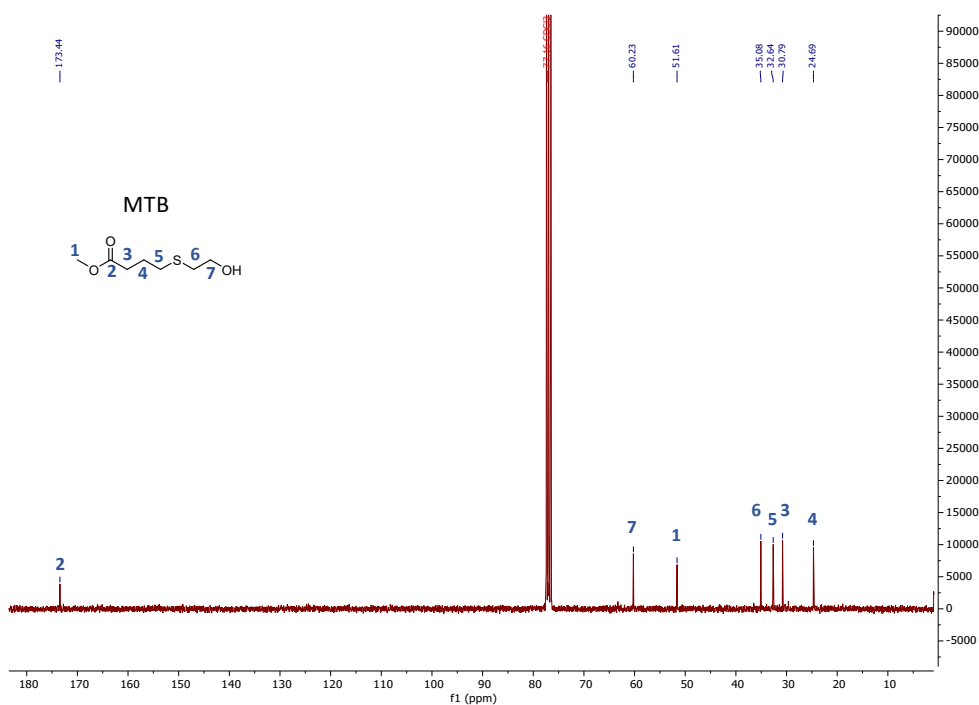

Figure S5. <sup>13</sup>C NMR spectrum of MTB in CDCl<sub>3</sub>

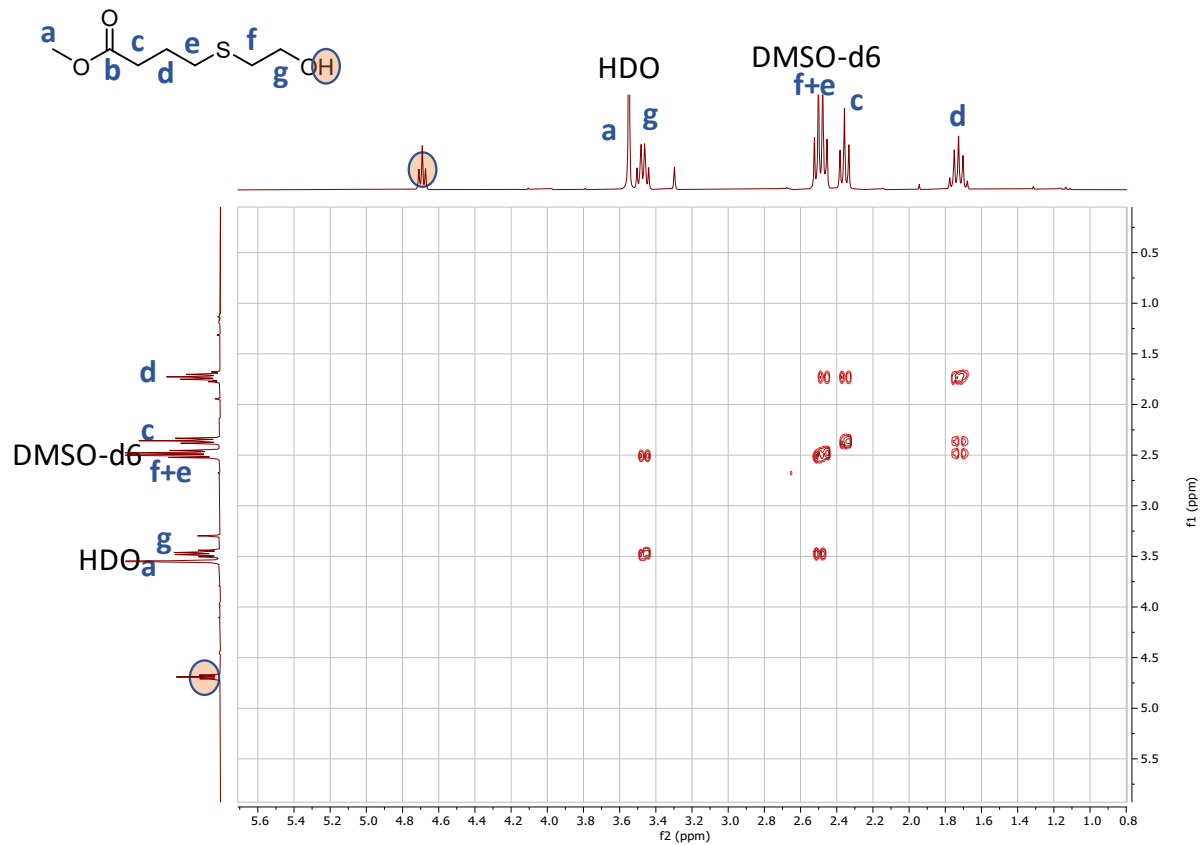

Figure S6. COSY spectrum of MTB in DMSO-d6

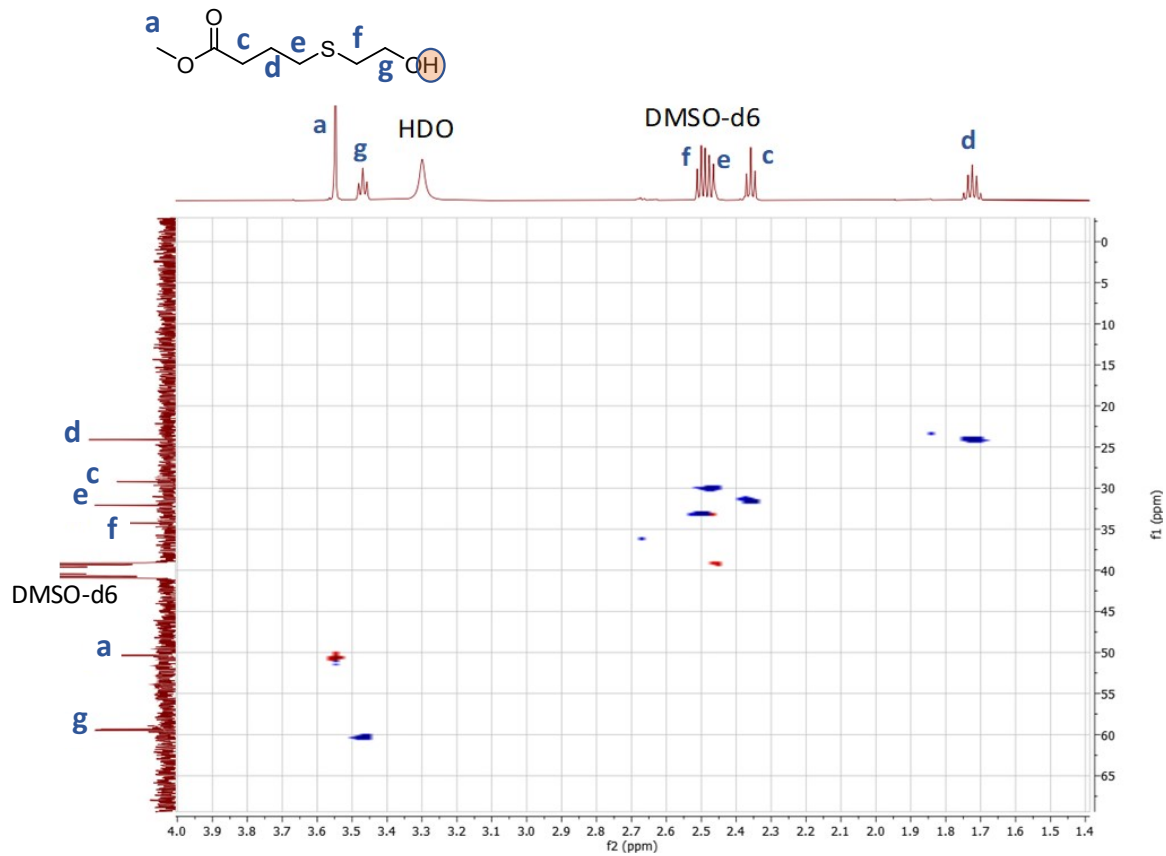

Figure S7. HSQC spectrum of MTB in DMSO-d6

# 3. AB monomer oxidation

## 3.1. Before purification

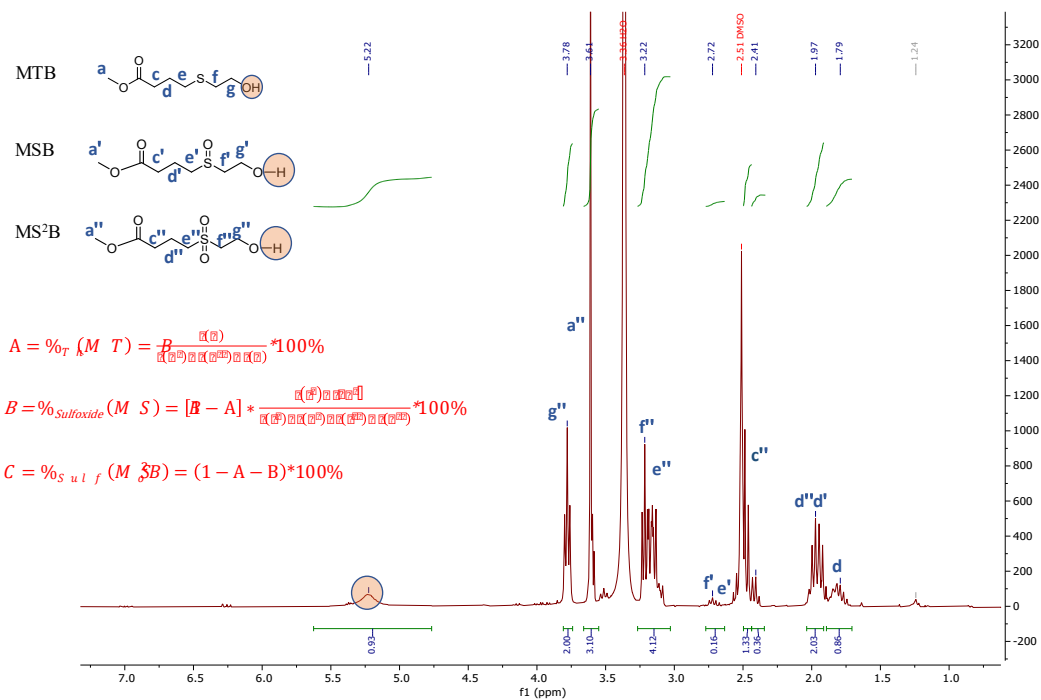

Figure S8. <sup>1</sup>H NMR spectrum of MTB oxidized by 20eq NaOCl before purification in DMSO-d<sub>6</sub>

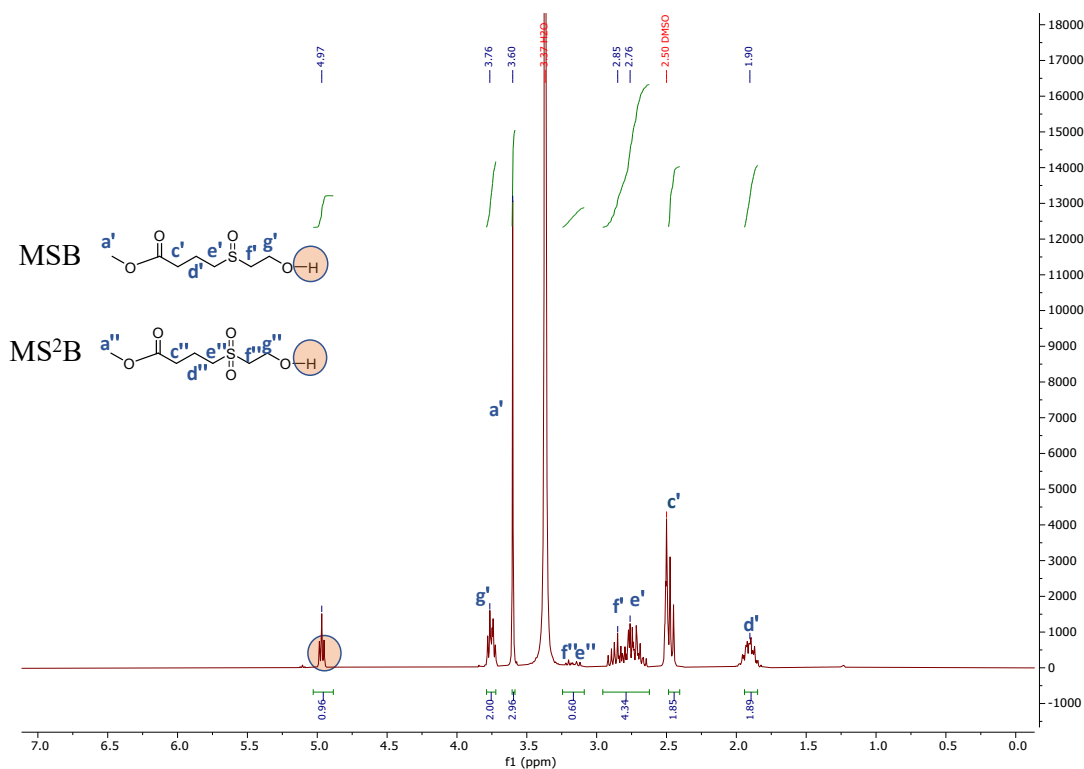

Figure S9. <sup>1</sup>H NMR spectrum of MTB oxidized by 2eq H<sub>2</sub>O<sub>2</sub> before purification in DMSO-d<sub>6</sub>

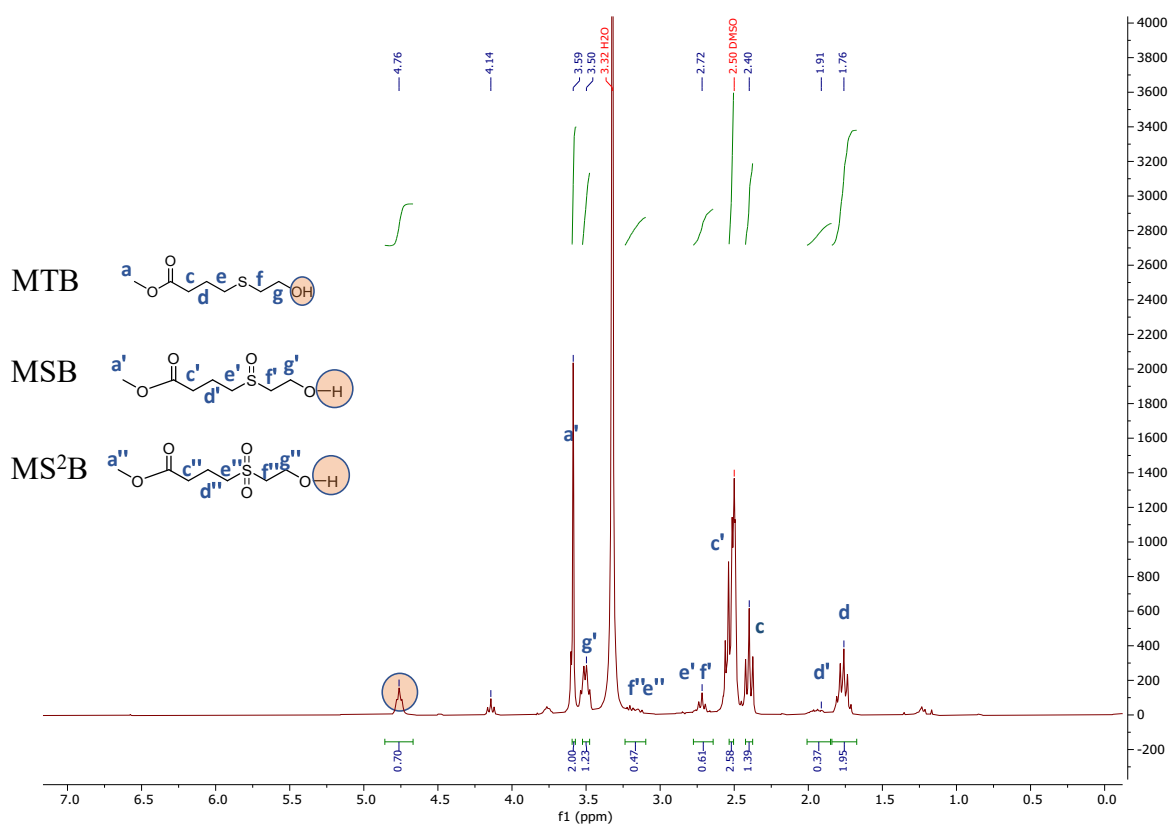

Figure S10. <sup>1</sup>H NMR spectrum of MTB oxidized by 2eq NaOCl before purification in DMSO-d<sub>6</sub>

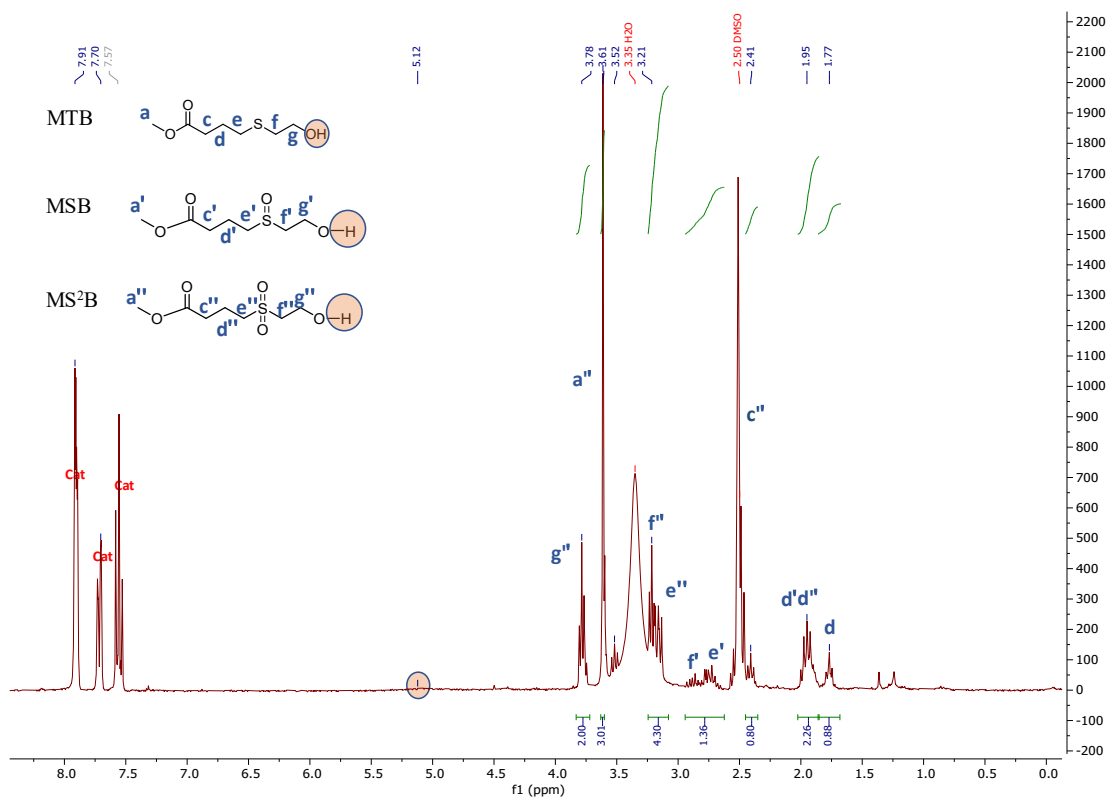

Figure S11. <sup>1</sup>H NMR spectrum of MTB oxidized by 2eq M-CPBA before purification in DMSO-d<sub>6</sub>

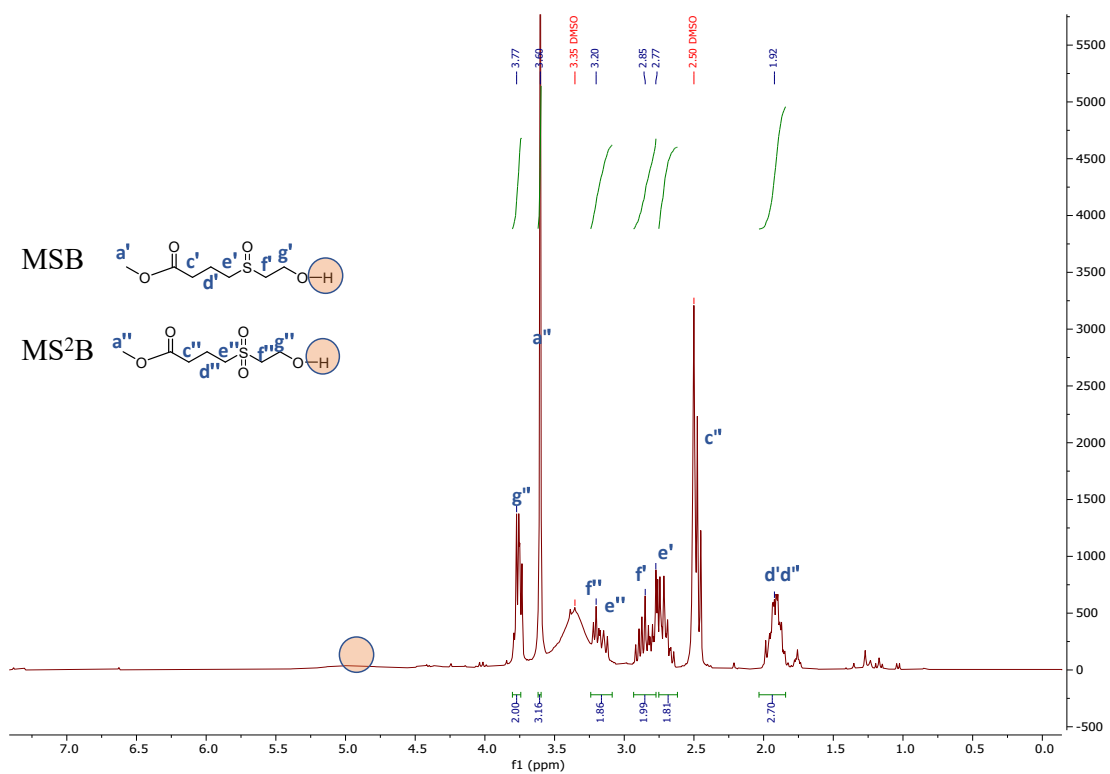

Figure S12. <sup>1</sup>H NMR spectrum of MTB oxidized by 20eq H<sub>2</sub>O<sub>2</sub> before purification in DMSO-d<sub>6</sub>

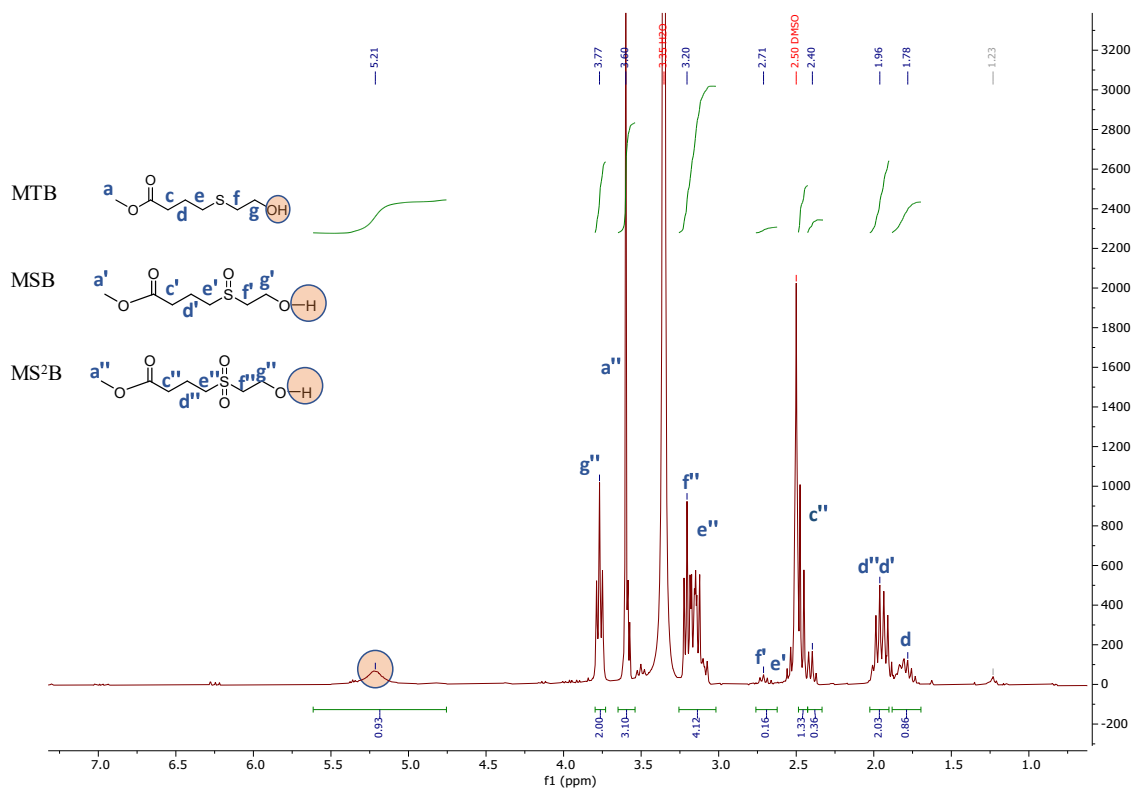

Figure S13. <sup>1</sup>H NMR spectrum of MTB oxidized by 20eq NaOCl before purification in DMSO-d<sub>6</sub>

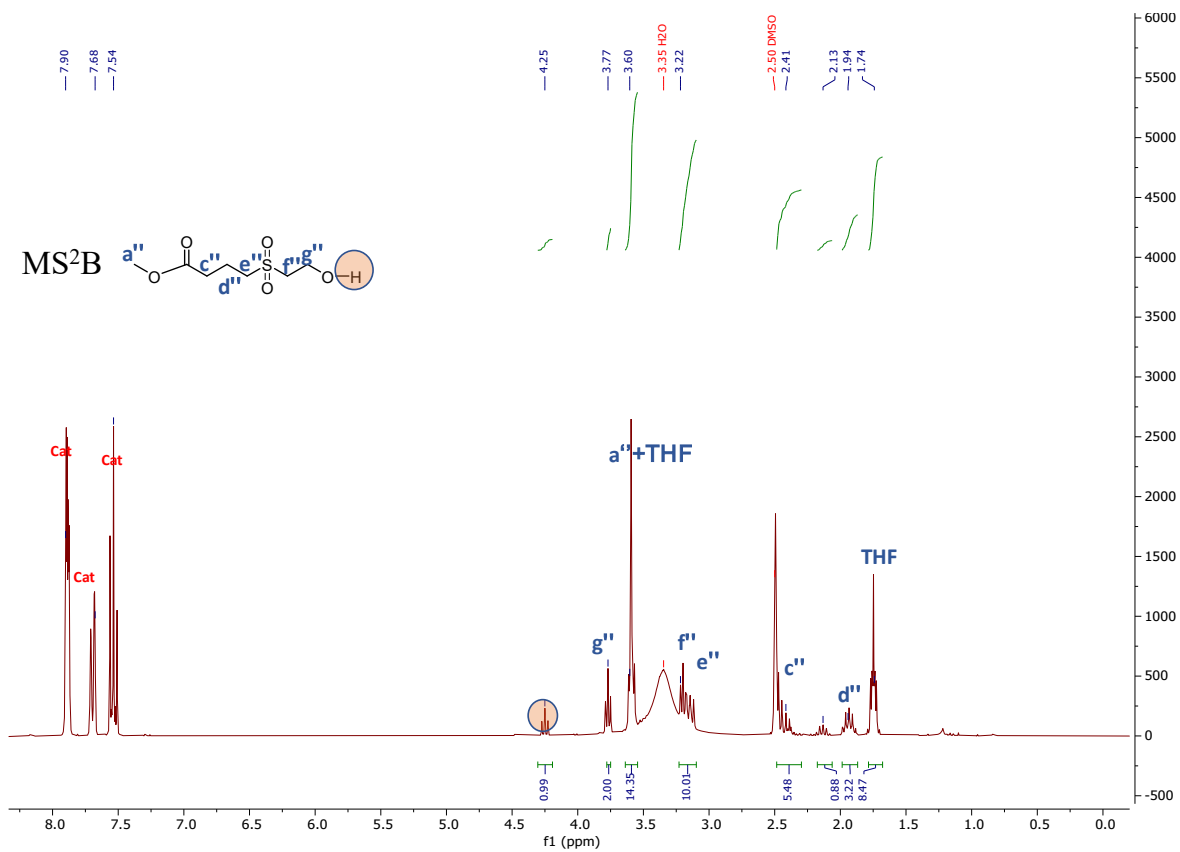

**Figure S14.** <sup>1</sup>H NMR spectrum of MTB oxidized by 20eq M-CPBA before purification in DMSO-d<sub>6</sub>

## 3.2. After purification

### 3.2.1. Sulfoxide

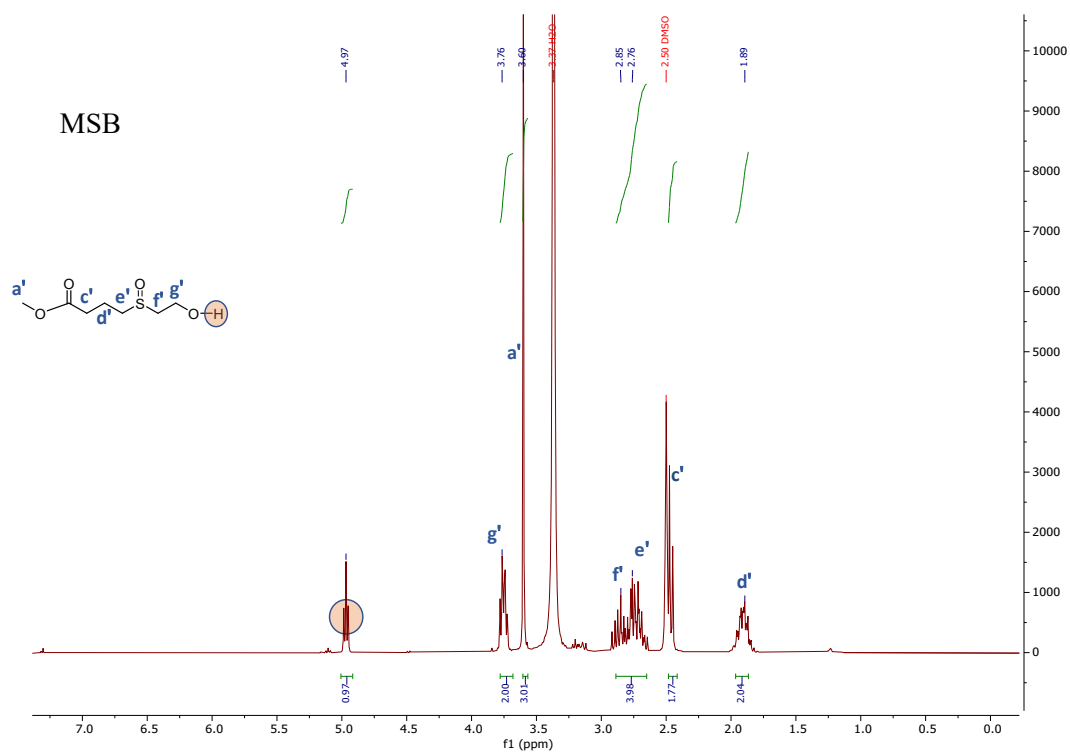

Figure S15. <sup>1</sup>H NMR spectrum of MTB oxidized by 2eq NaOCl after purification in DMSO-d<sub>6</sub>

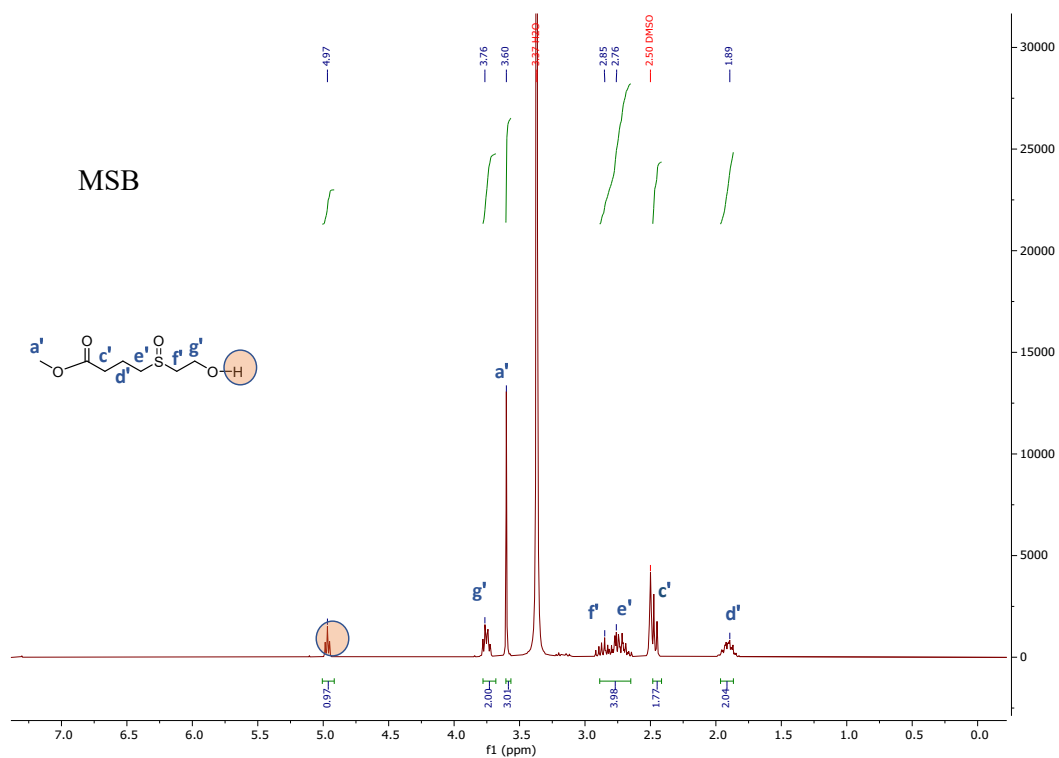

Figure S16. <sup>1</sup>H NMR spectrum of MTB oxidized by 2eq M-CPBA after purification in DMSO-d<sub>6</sub>

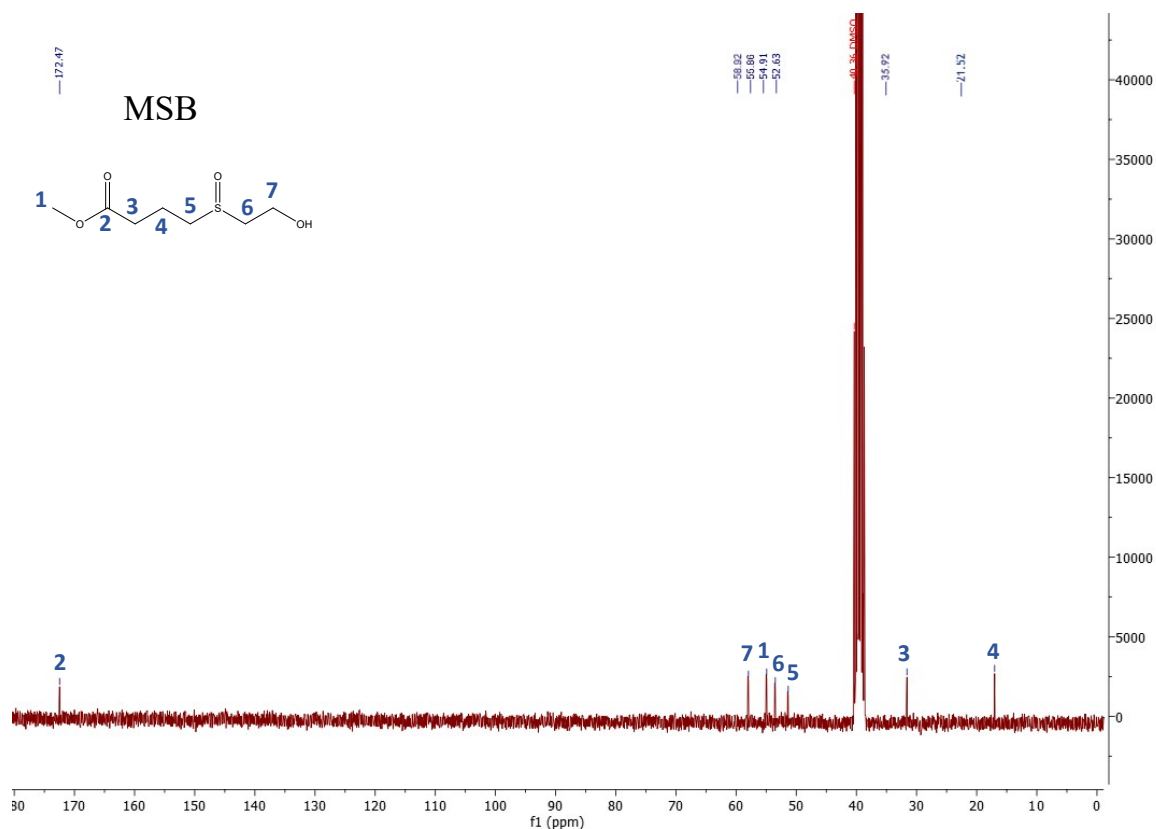

Figure S17.  $^{13}\text{C}$  NMR spectrum of of MTB oxidized by 2eq NaOCl after purification in DMSO-d<sub>6</sub>

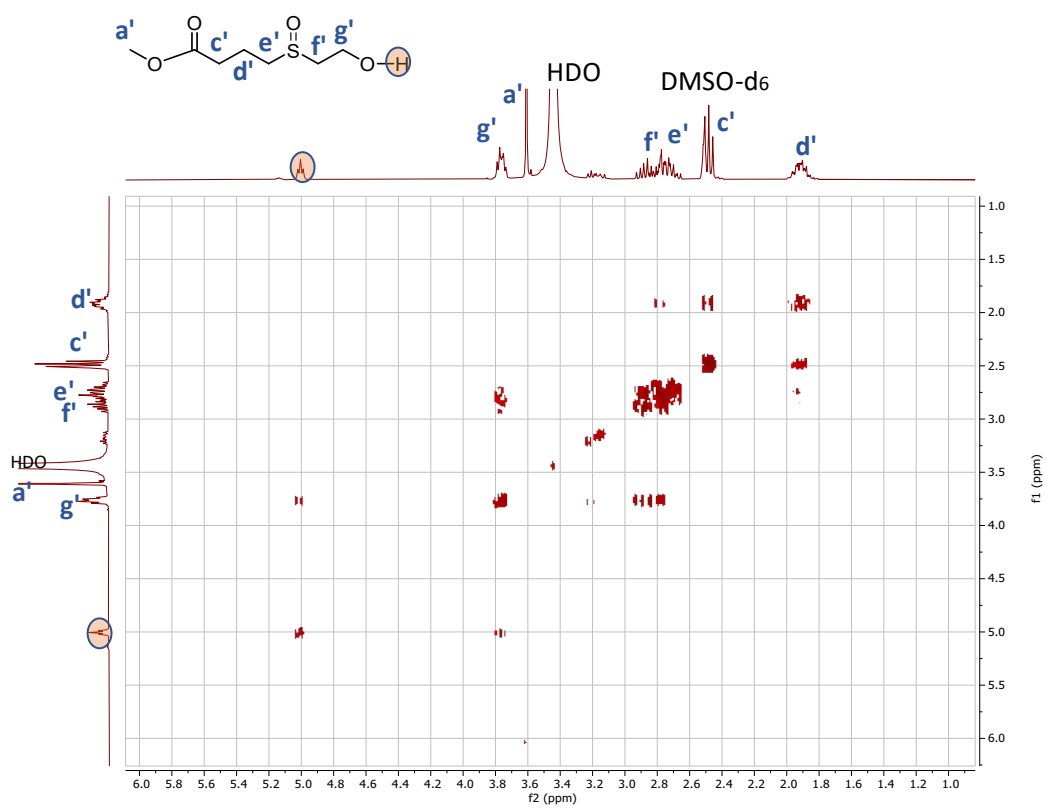

Figure S18. COSY spectrum of MTB oxidized by 2eq NaOCl after purification in DMSO-d<sub>6</sub>

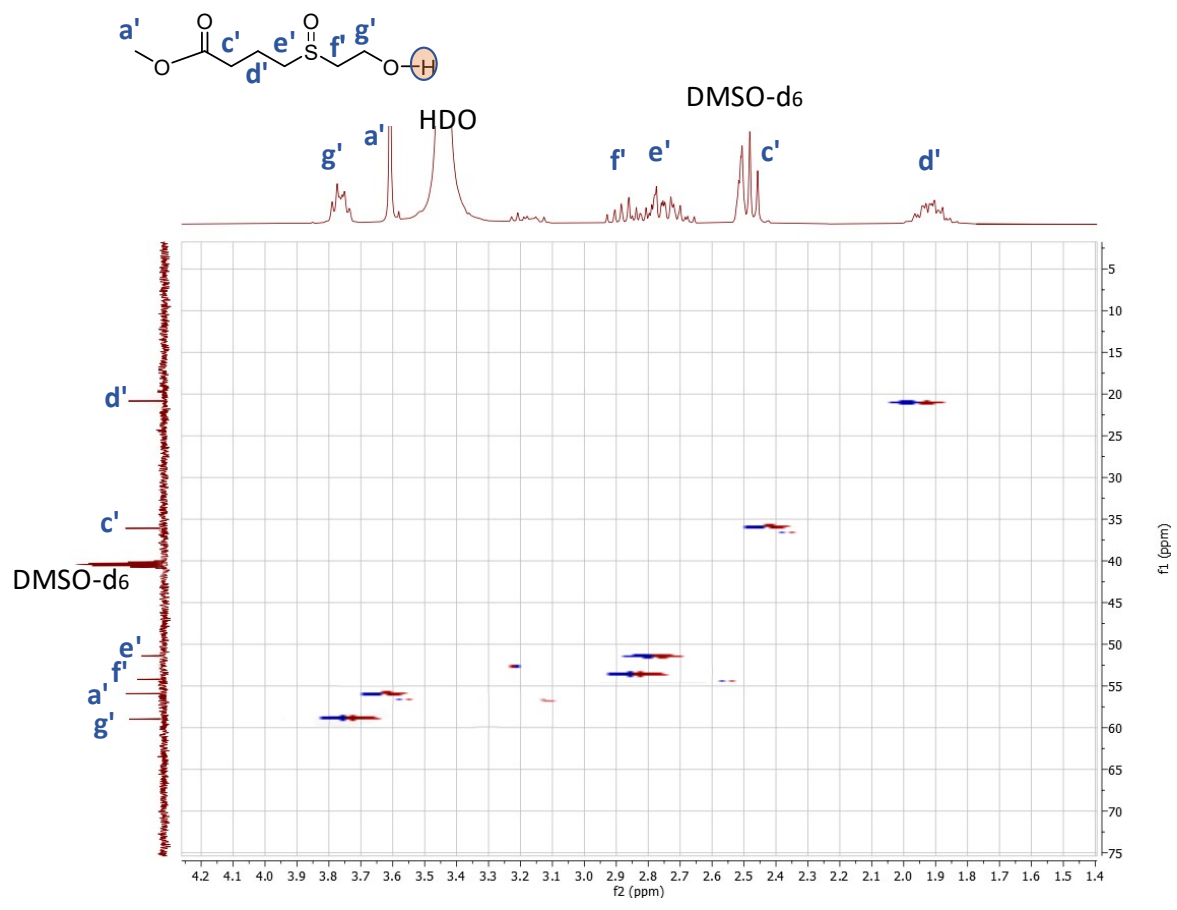

Figure S19. HSQC spectrum of of MTB oxidized by 2eq NaOCl after purification in DMSO-d<sub>6</sub>

### 3.2.2. Sulfone

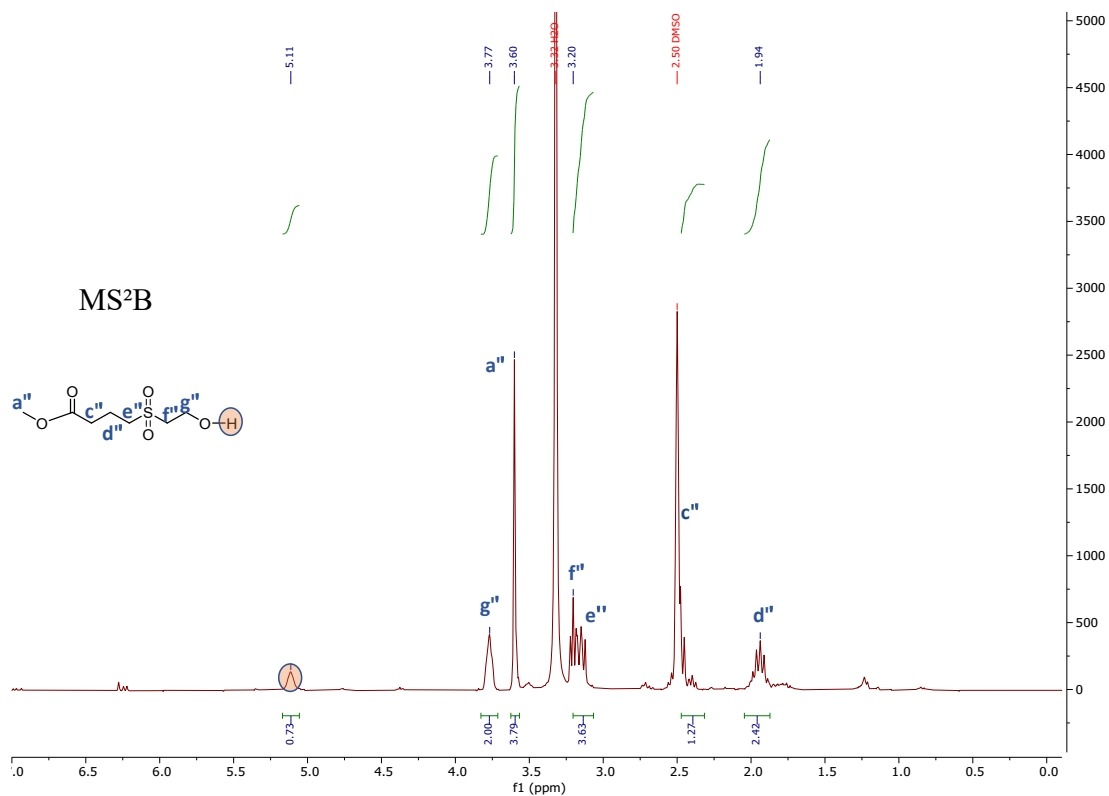

Figure S20. <sup>1</sup>H NMR spectrum of MTB oxidized by 20eq NaOCl after purification in DMSO-d<sub>6</sub>

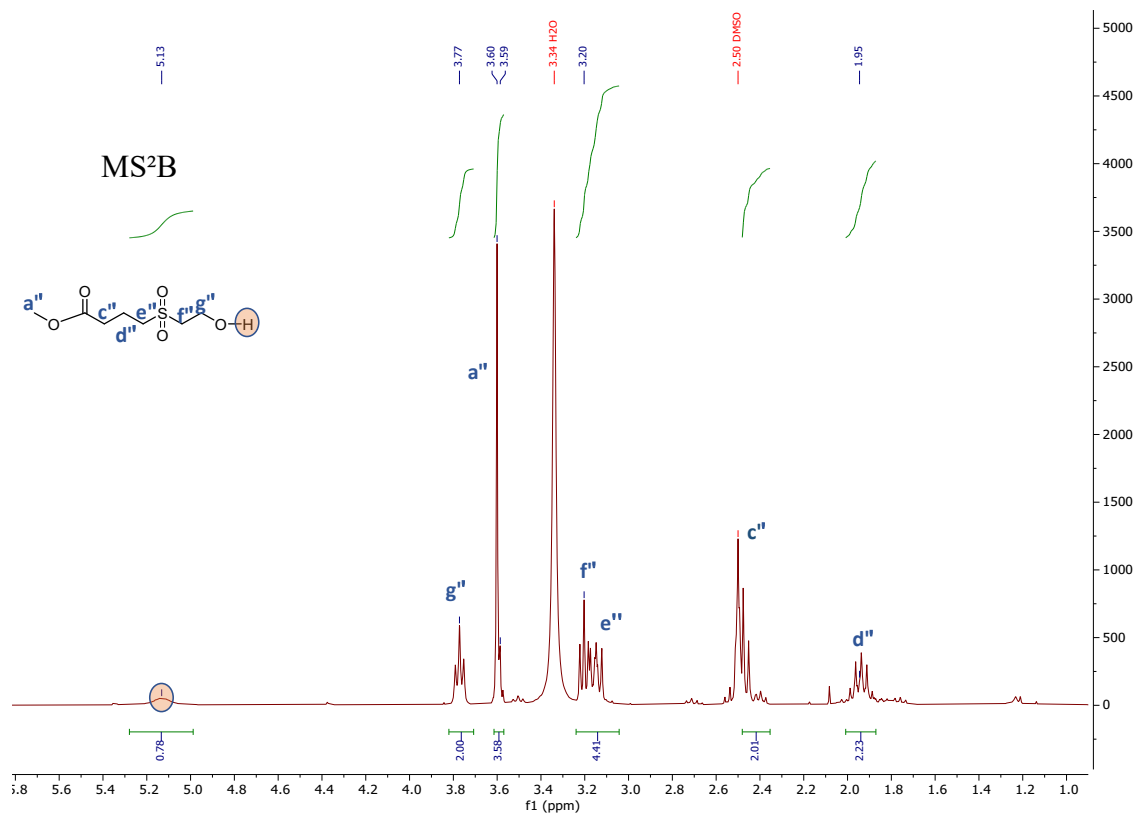

Figure S21. <sup>1</sup>H NMR spectrum of MTB oxidized by 20eq m-CPBA after purification in DMSO-d<sub>6</sub>

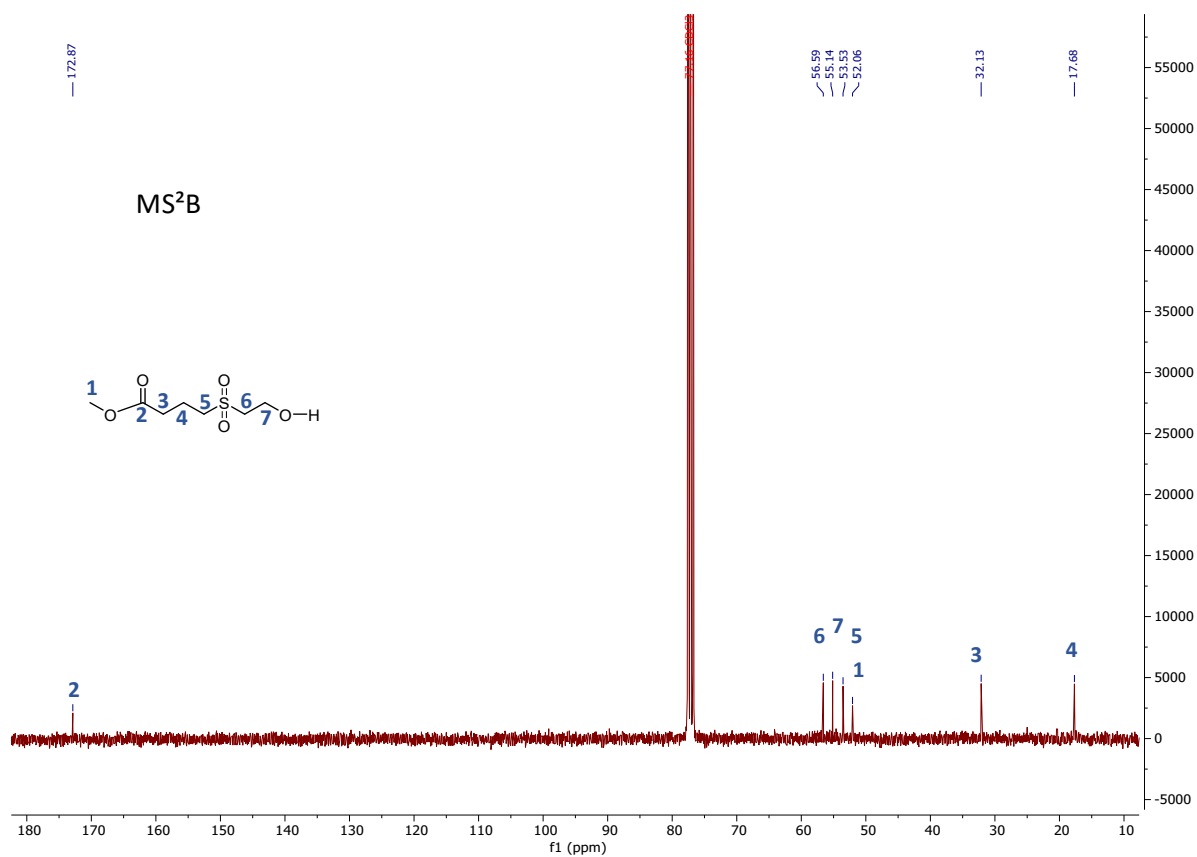

**Figure S22.** <sup>13</sup>C NMR spectrum of MS<sup>2</sup>B oxidized by 20eq m-CPBA in CDCl<sub>3</sub>

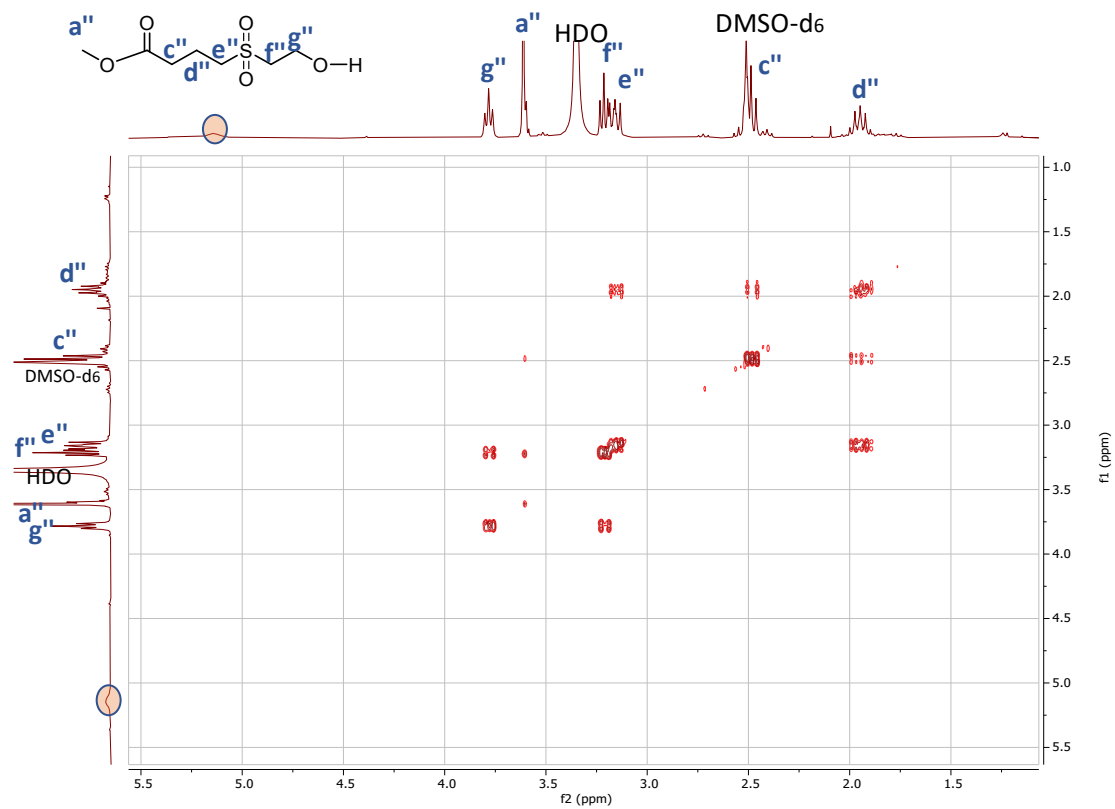

**Figure S23.** COSY spectrum of MS<sup>2</sup>B oxidized by 20eq m-CPBA after purification in DMSO-d<sub>6</sub>

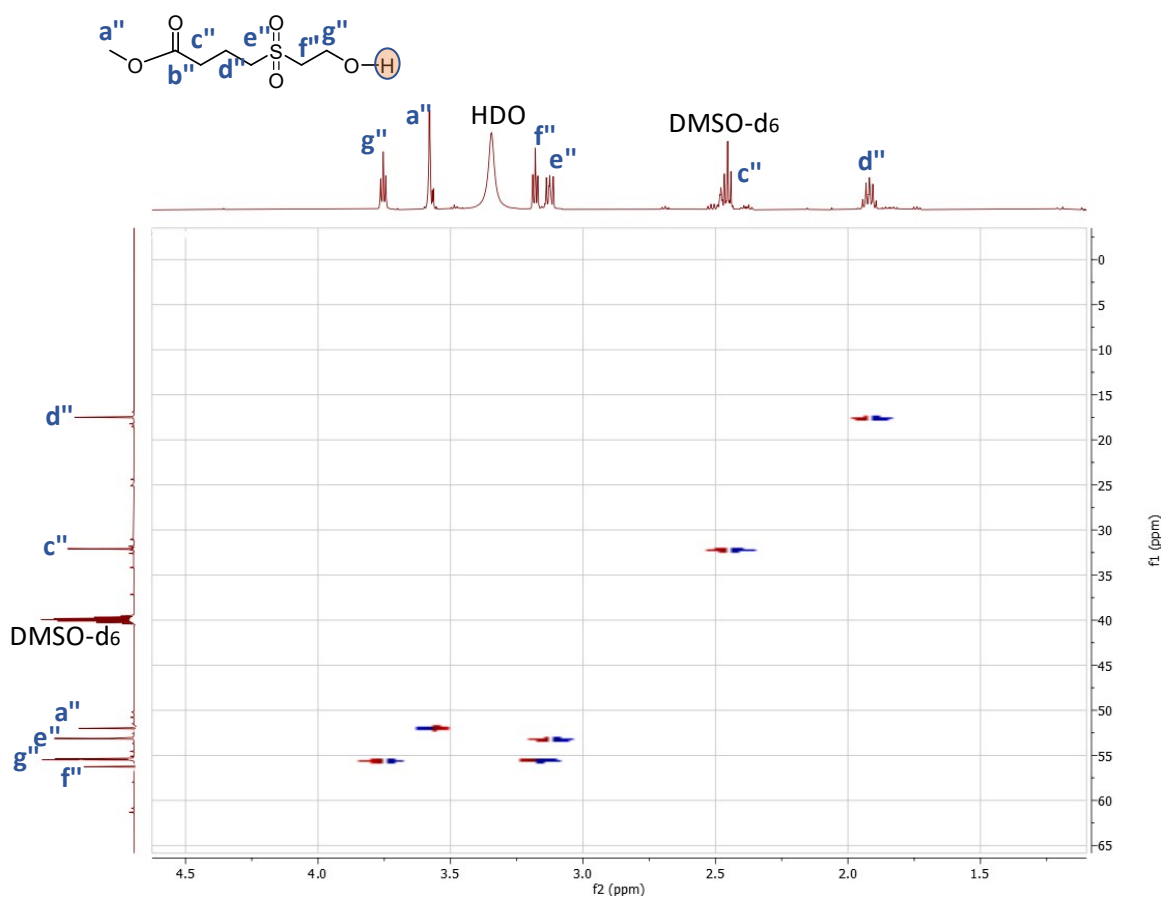

**Figure S24.** HSQC spectrum of MS<sup>2</sup>B oxidized by 20eq m-CPBA after purification in DMSO-d<sub>6</sub>

## 4. Polycondensation

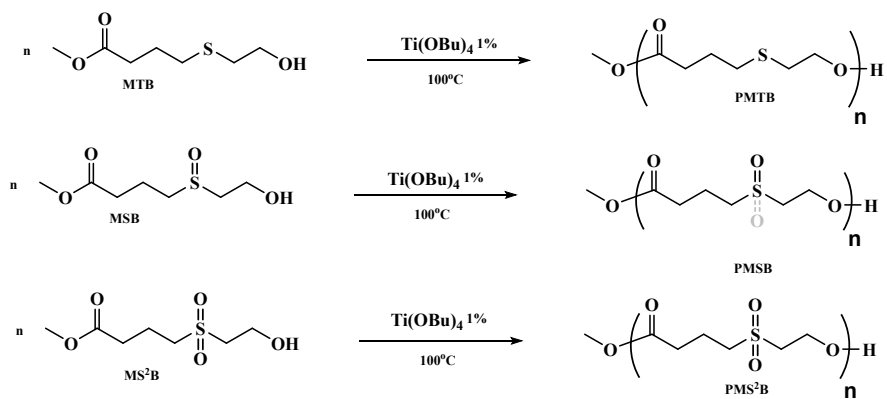

Scheme S2. Polycondensation of MTB, MSB, MS<sup>2</sup>B

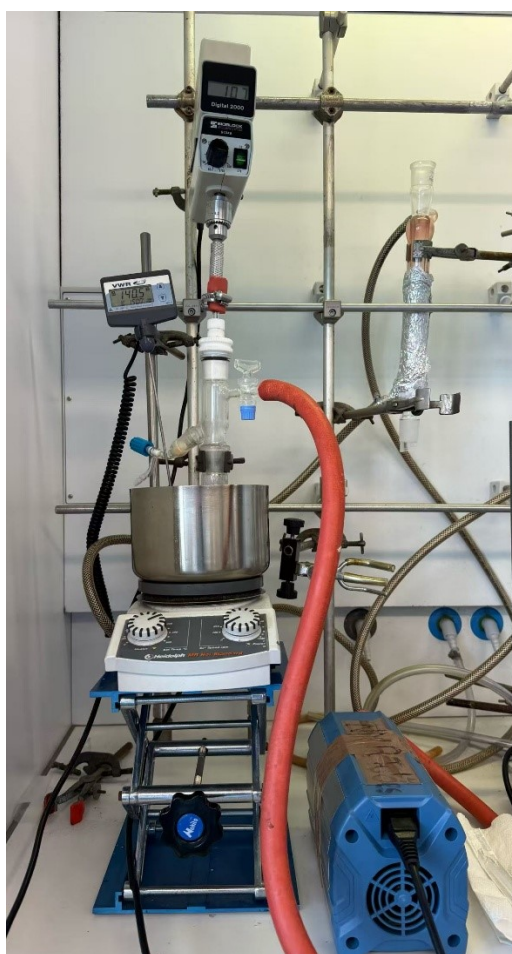

Figure S25. Experimental setup for polycondensation reactions

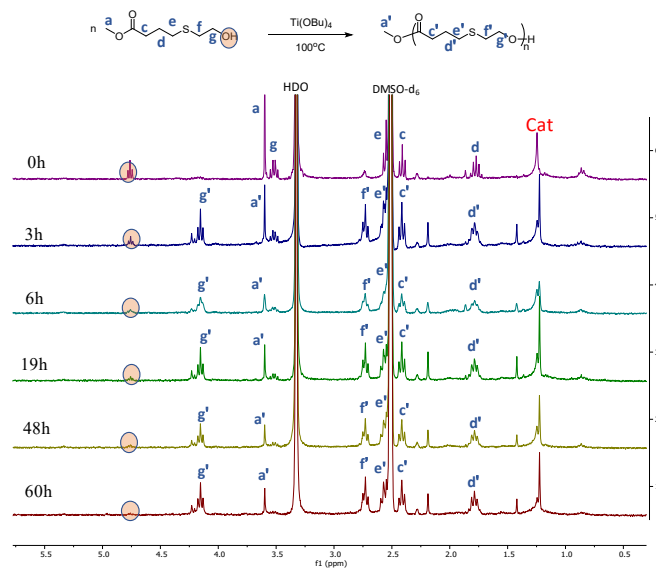

Figure S26.  $^1\text{H}$  NMR spectrum of MTB polycondensation at  $100^\circ\text{C}$  (in  $\text{DMSO-d}_6$ )

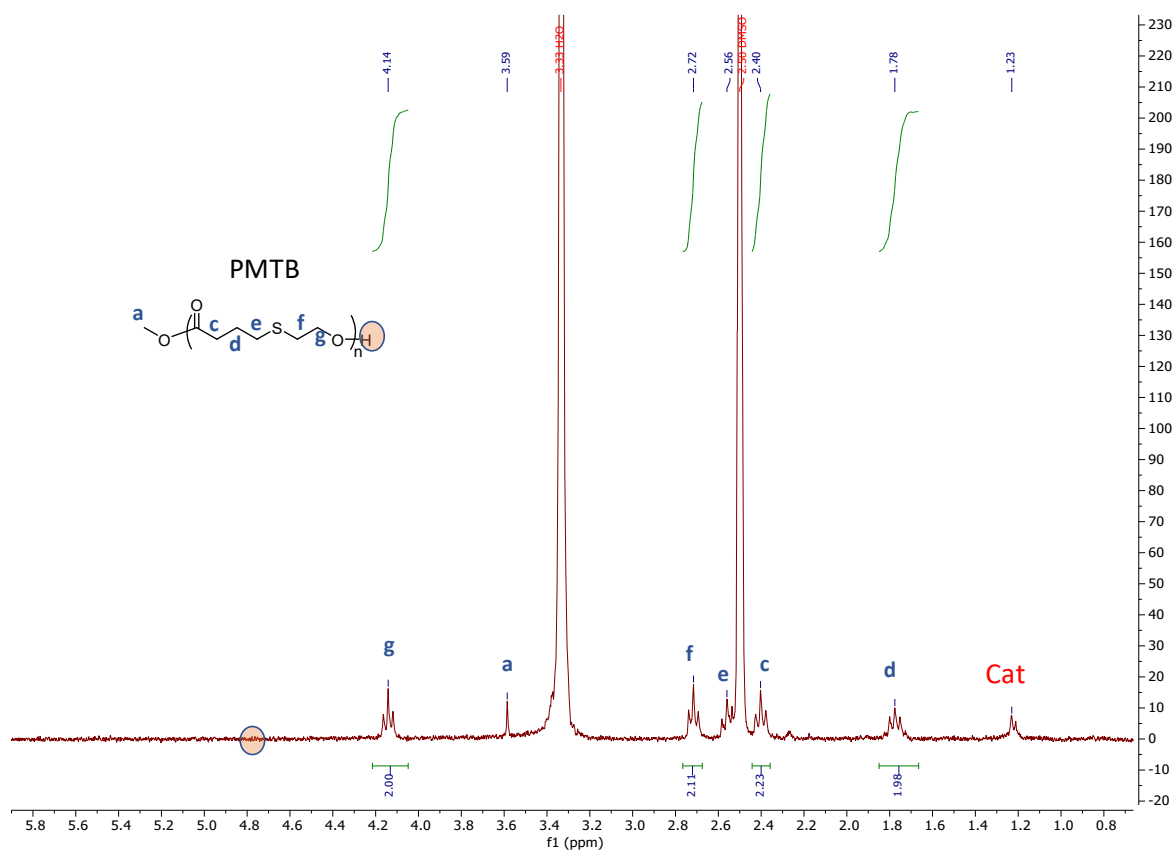

Figure S27.  $^1\text{H}$  NMR spectrum of PMTB (in  $\text{DMSO-d}_6$ )

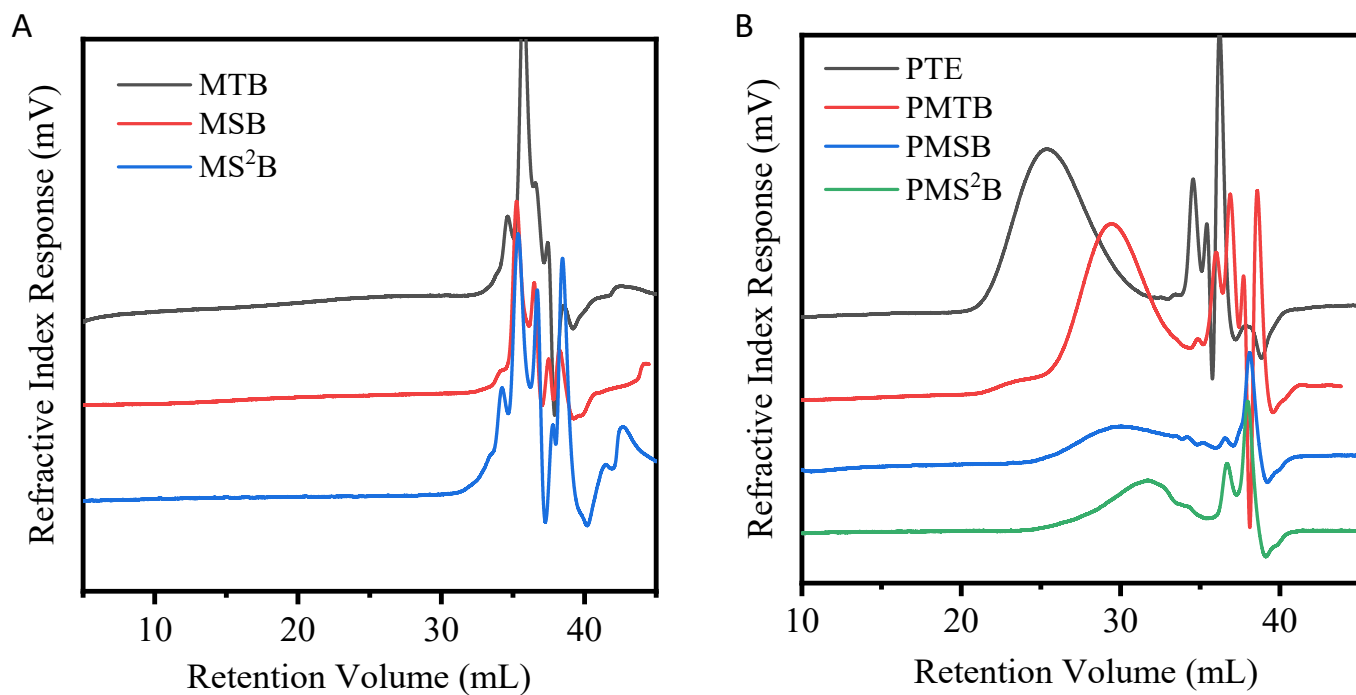

**Figure S28.** A SEC chromatograms comparison of MTB, MSB, MS<sup>2</sup>B and **B** SEC chromatograms comparison of PTE, PMTB, PMSB, PMS<sup>2</sup>B

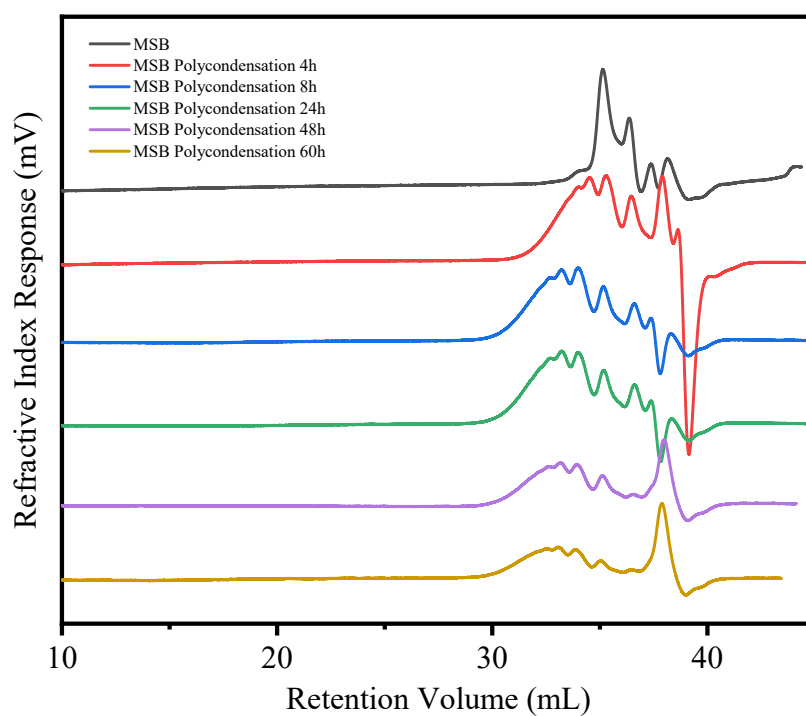

**Figure S29.** SEC chromatograms of MSB polycondensation over time

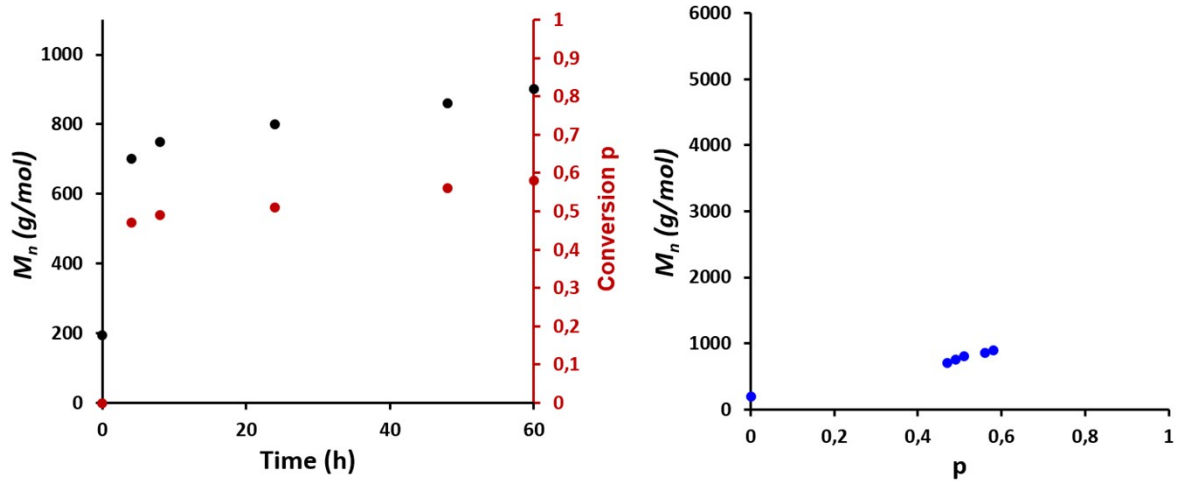

**Figure S30.** Evolution of polymerization kinetics of MSB showing the number-average molar mass  $M_n$  as functions of time (left) and conversion (right).

**Table S3.** Polycondensation of MTB, 1,6-Hexanediol and Adipic acid

| Time (h) | $M_{n, SEC}$ after polycondensation (g mol <sup>-1</sup> ) | $M_{w, SEC}$ after polycondensation (g mol <sup>-1</sup> ) | $\bar{D}$ |
|----------|------------------------------------------------------------|------------------------------------------------------------|-----------|
| 3        | 260                                                        | 348                                                        | 1.3       |
| 24       | 828                                                        | 1815                                                       | 2.2       |
| 35       | 1751                                                       | 2988                                                       | 1.7       |
| 55       | 3210                                                       | 7968                                                       | 2.5       |
| 72       | 5650                                                       | 16517                                                      | 2.9       |

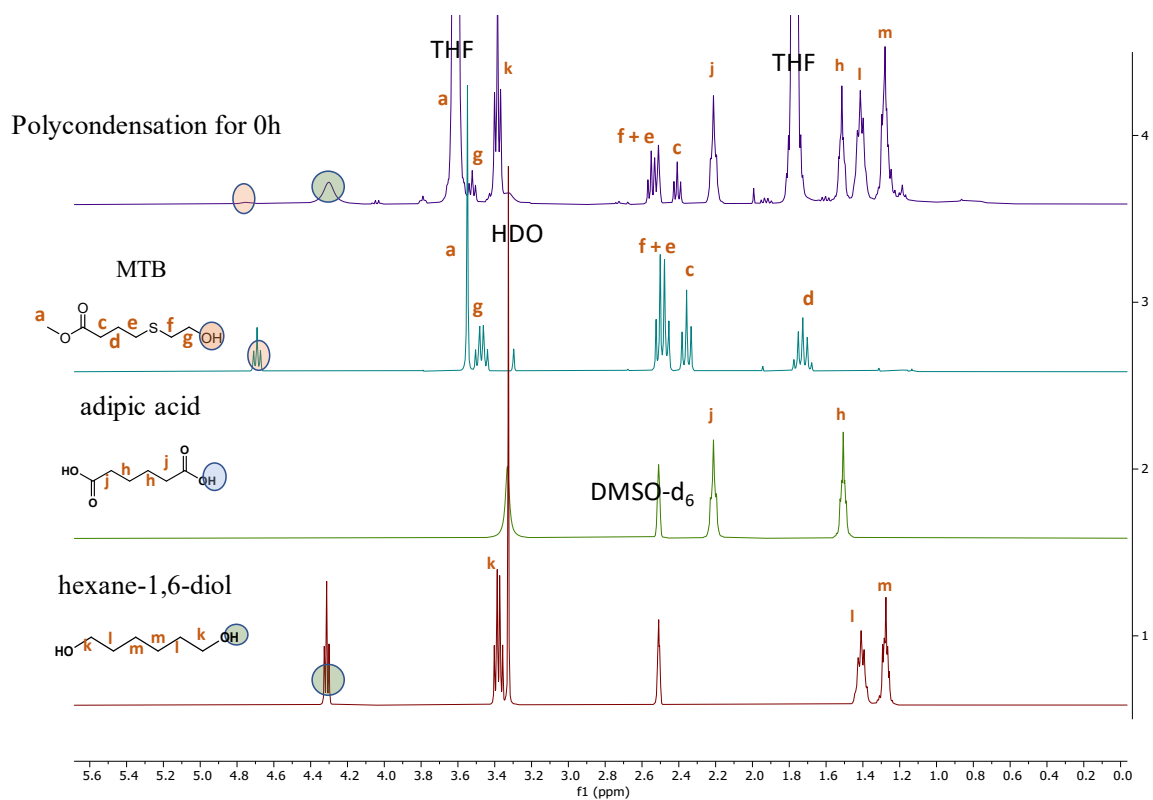**Figure S31.** <sup>1</sup>H NMR spectra of hexane-1,6-diol, adipic acid, MTB monomers and of their mixture at t=0 (in DMSO-d<sub>6</sub>)

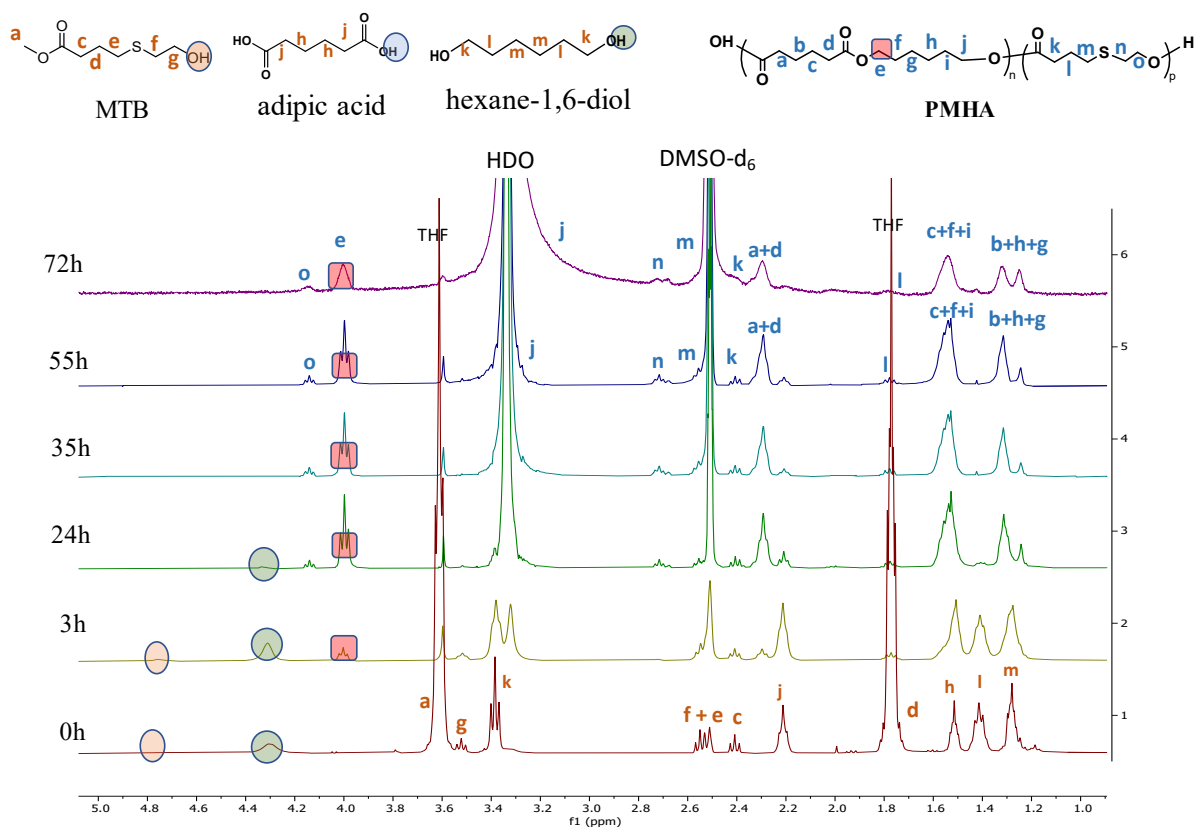

**Figure S32.**  $^1\text{H}$  NMR spectrum of PMHA polycondensation reaction over time (in  $\text{DMSO-d}_6$ )

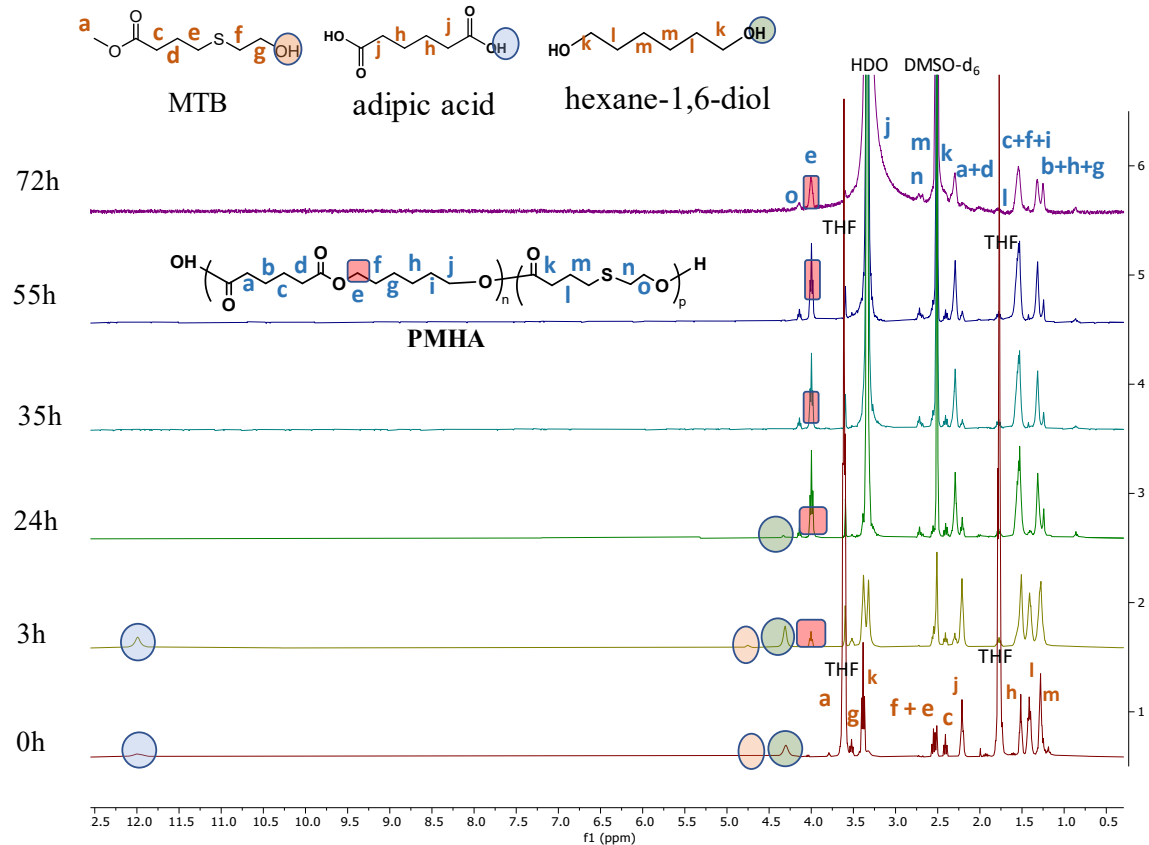

**Figure S33.**  $^1\text{H}$  NMR spectrum of PMHA polycondensation reaction over time (in  $\text{DMSO-d}_6$ )

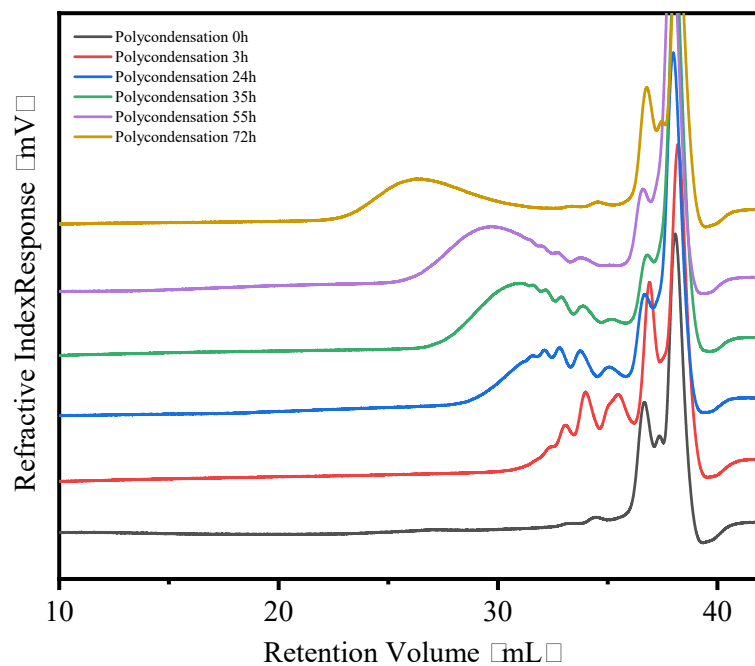

**Figure S34.** SEC chromatograms of PMHA polycondensation reaction over time

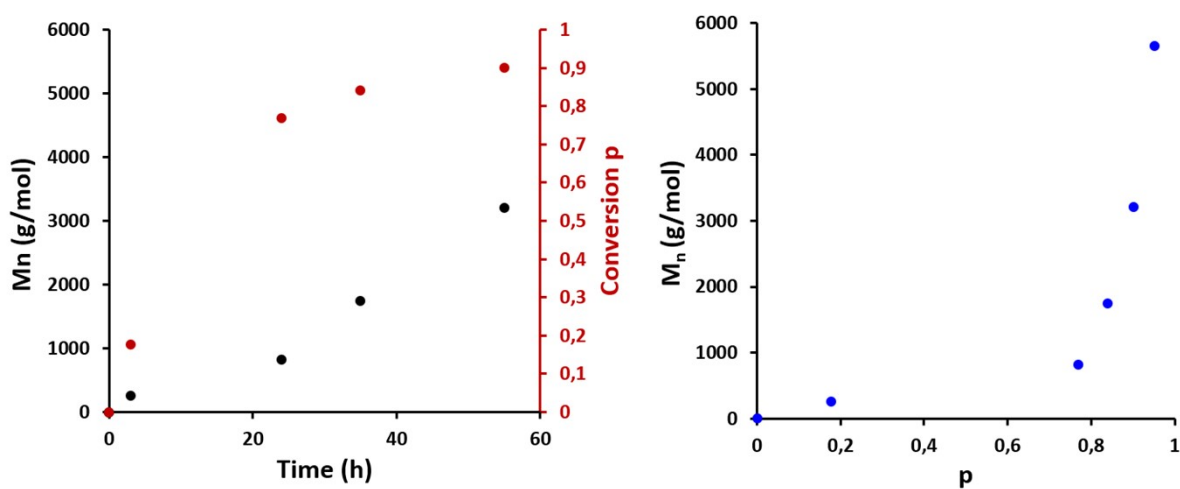

**Figure S35.** Evolution of polymerization kinetics of MTB, 1,6-hexanediol and adipic acid showing the number-average molar mass  $M_n$  as functions of time (left) and conversion (right).

## 5. TGA and DSC

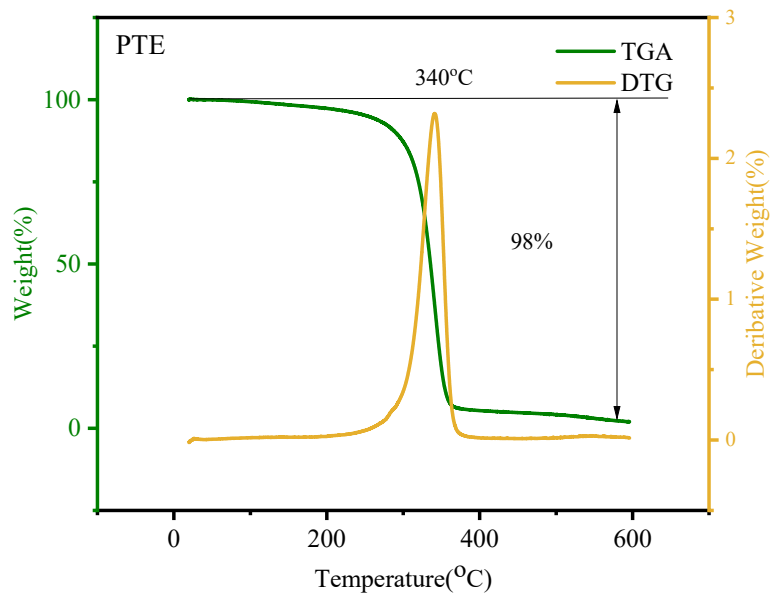

Figure S36. TGA curves of PTE 10°C/min

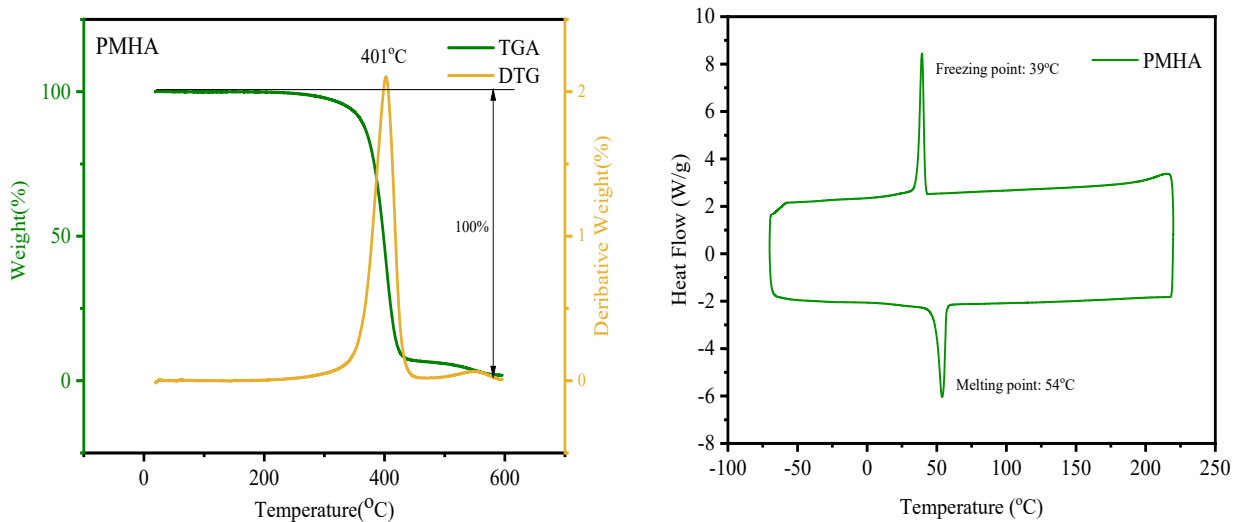

Figure S37. TGA and DSC curves of PMHA 10°C/min

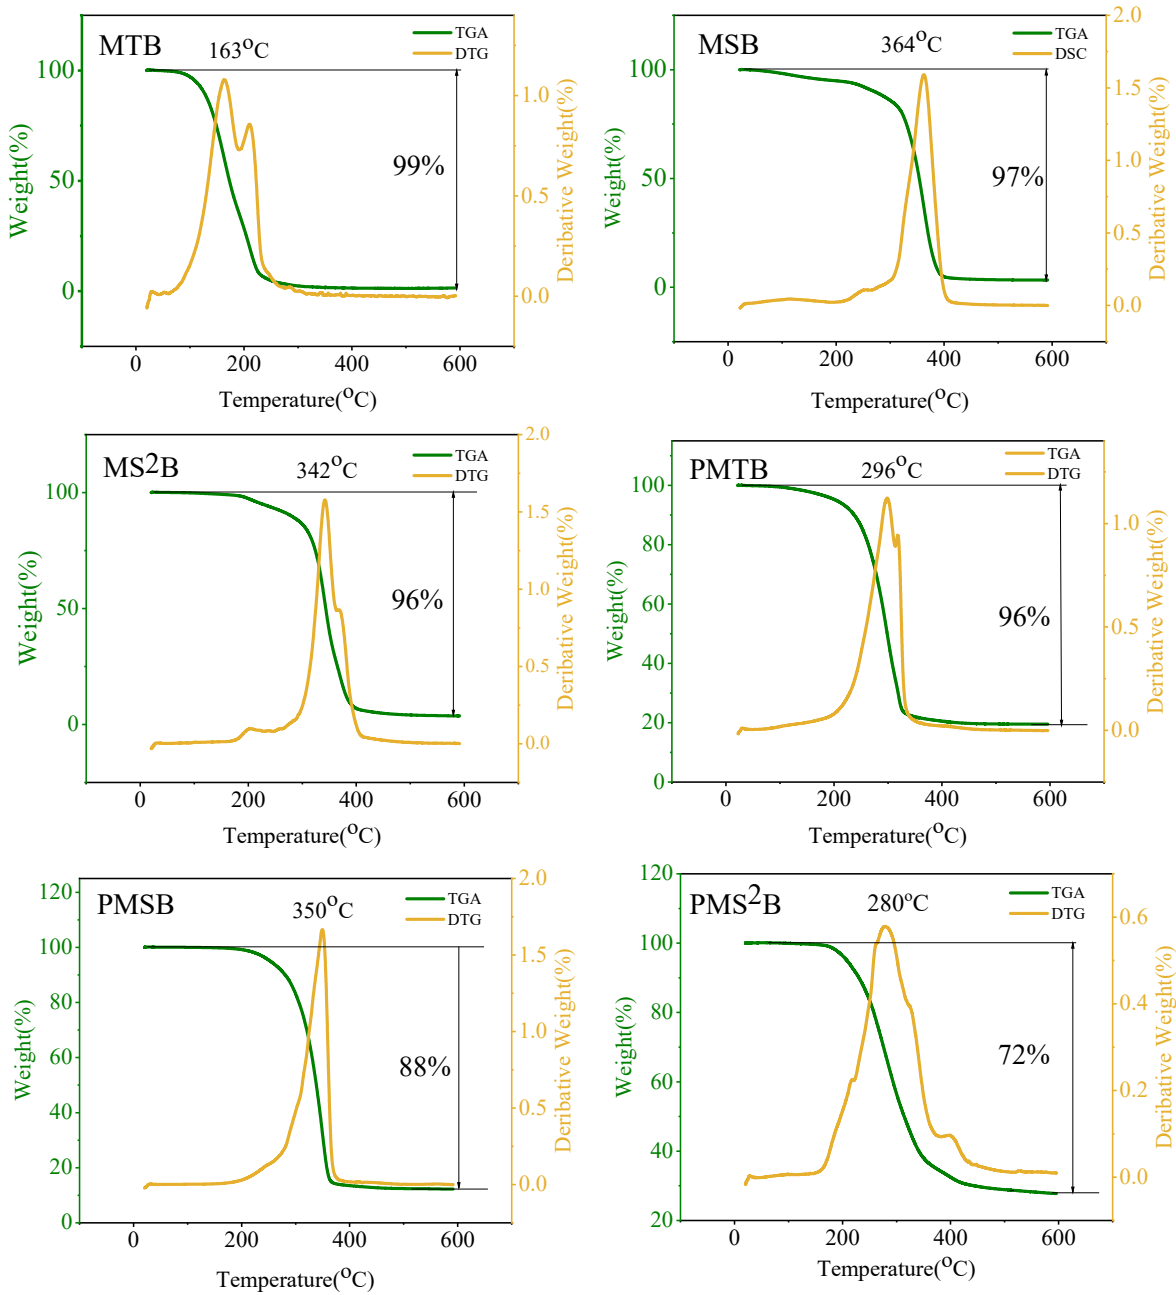

**Figure S38.** TGA curves of MTB MSB MS<sup>2</sup>B, PTE, PMTB, PMSB and PMS<sup>2</sup>B 10°C/min

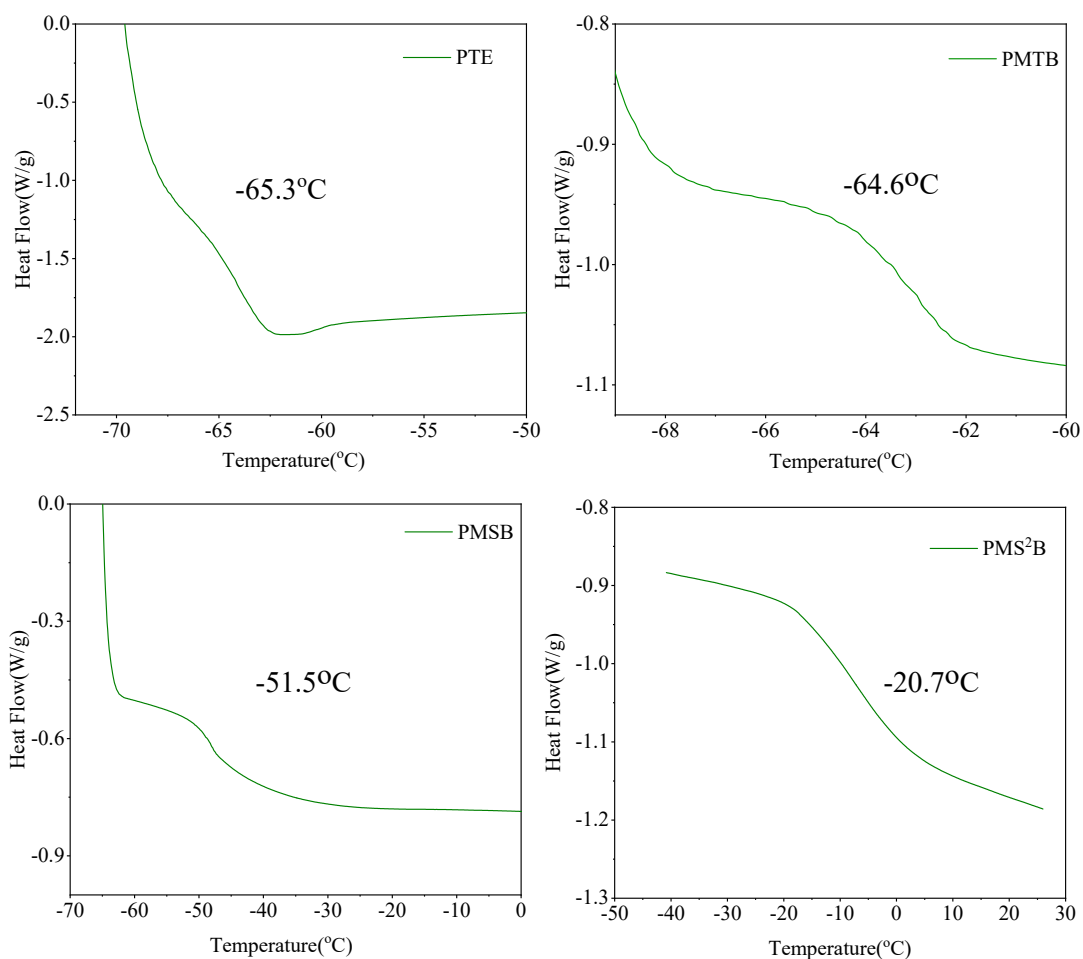

**Figure S39.** DSC curves of second heating scans at 10 °C min<sup>-1</sup> of PTE, PMTB, PMSB and PMS<sup>2</sup>B

## 6. Monomer and Polymer Solubility Table

**Table S4.** Solubility of monomers and polymers in water

| Run | Name               | Solubility (√soluble, ×insoluble) |
|-----|--------------------|-----------------------------------|
| 1   | MTB                | +                                 |
| 2   | MSB                | +                                 |
| 3   | MS <sup>2</sup> B  | +                                 |
| 4   | PTE                | -                                 |
| 5   | PMSB               | -                                 |
| 6   | PMS <sup>2</sup> B | +/-                               |

## 7. Individual HRMS results

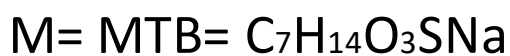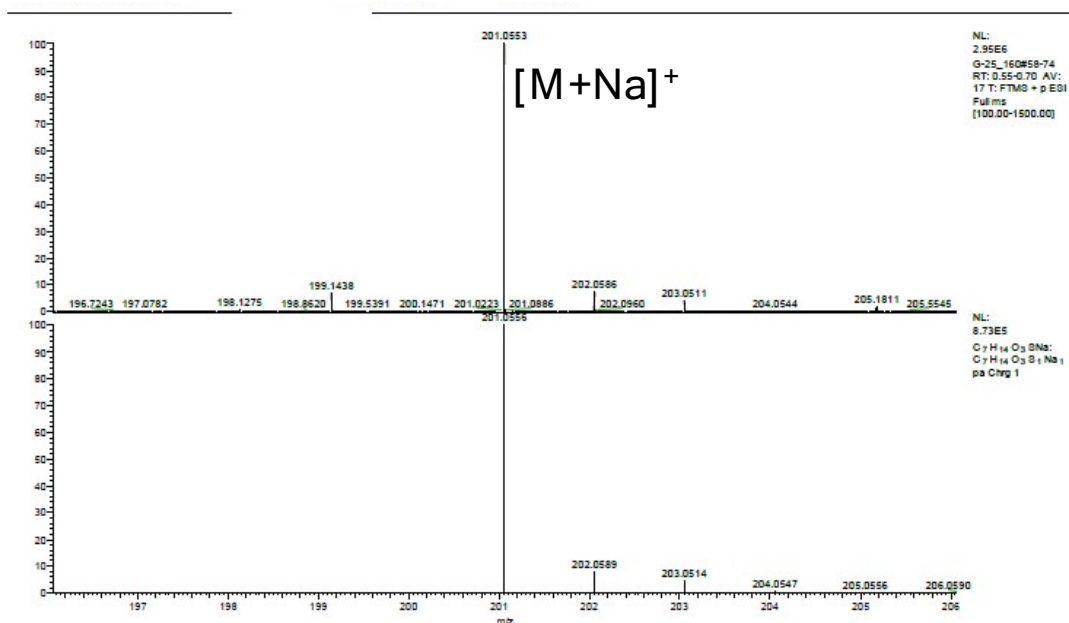

### Experimental/theoretical isotopic pattern MS spectrum

Error = -1.4 ppm; Relative Intensity (%) 100

HRMS (ESI) m/z:  $[M+Na]^+$  Calcd for  $C_7H_{14}O_3SNa$  201.0556. Found 201.0553; (Error: -1.4 ppm).

**COMPLIANT**

Figure S40. HRMS analysis of MTB

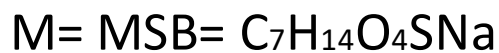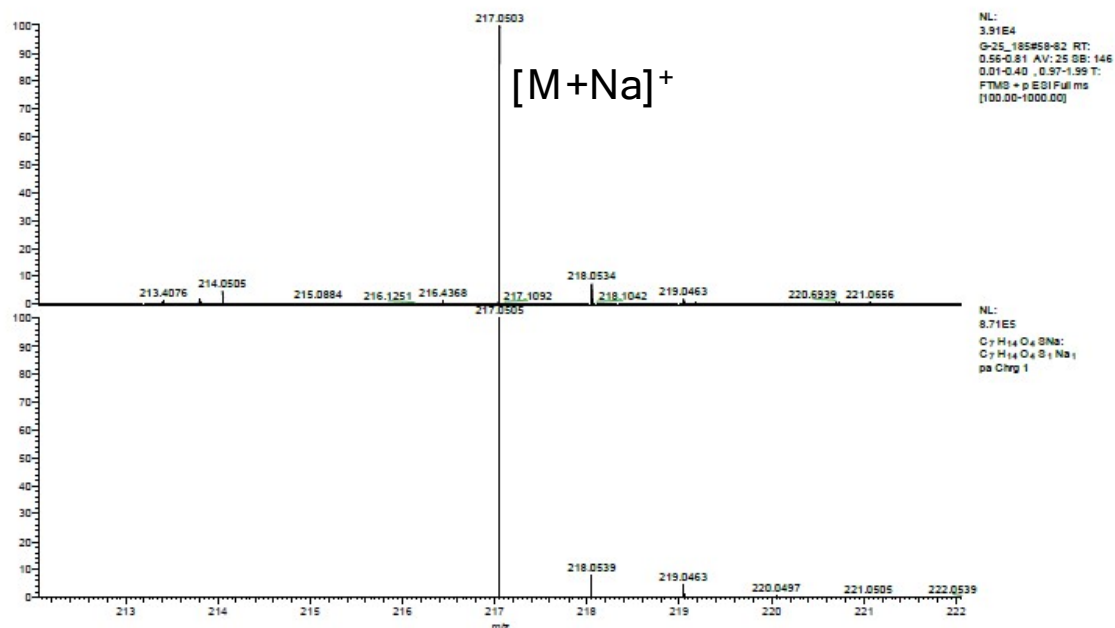

## Experimental/theoretical isotopic pattern MS spectrum

Error = -0.9 ppm; Relative Intensity (%) 100

HRMS (ESI) m/z: [M+Na]<sup>+</sup> Calcd for C<sub>7</sub>H<sub>14</sub>O<sub>4</sub>Na 217.0505. Found 217.0503; (Error: -0.9 ppm).

**COMPLIANT**

Figure S41. HRMS analysis of MSB

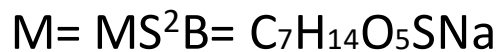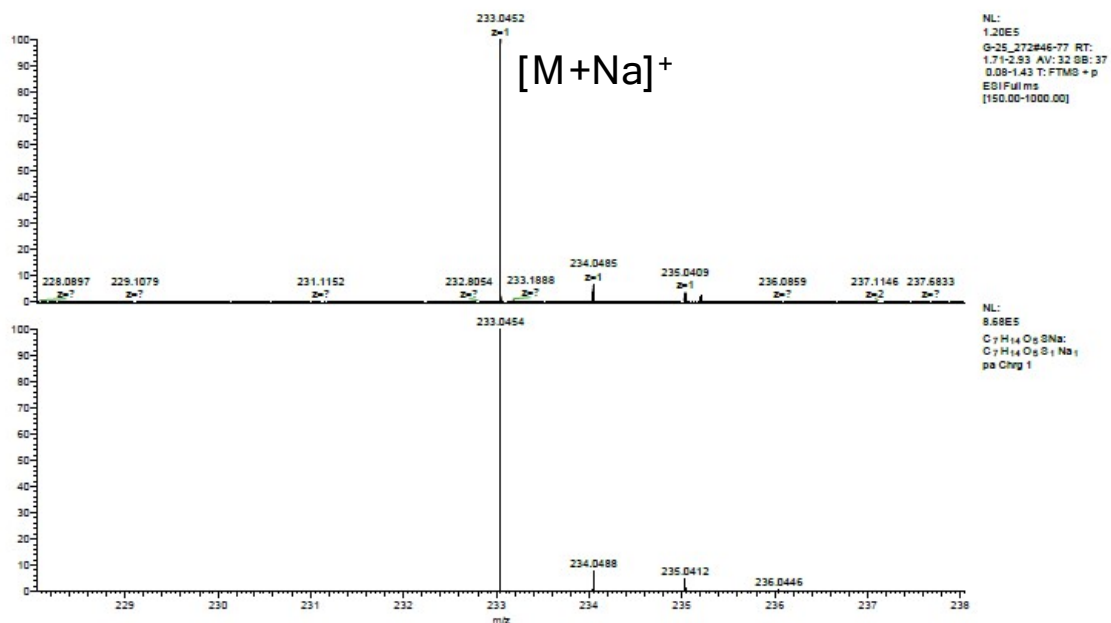

## Experimental/theoretical isotopic pattern MS spectrum

Error = -0.9 ppm; Relative Intensity (%) 100

HRMS (ESI) m/z: [M+Na]<sup>+</sup> Calcd for C<sub>7</sub>H<sub>14</sub>O<sub>5</sub>Na 233.0454. Found 233.0452; (Error: -0.9 ppm).

**COMPLIANT**

Figure S42. HRMS analysis of MS<sup>2</sup>B
